# Supplementary material for: Release of frustration drives corneal amyloid disaggregation by brain chaperone
Source: PubMed Central journal article supplement (PMC10063603; doi:10.1038/s42003-023-04725-1), 2023-03-30
Supplement: 42003_2023_4725_MOESM1_ESM.pdf [file 42003_2023_4725_MOESM1_ESM.pdf]

## Supplementary Figures

a

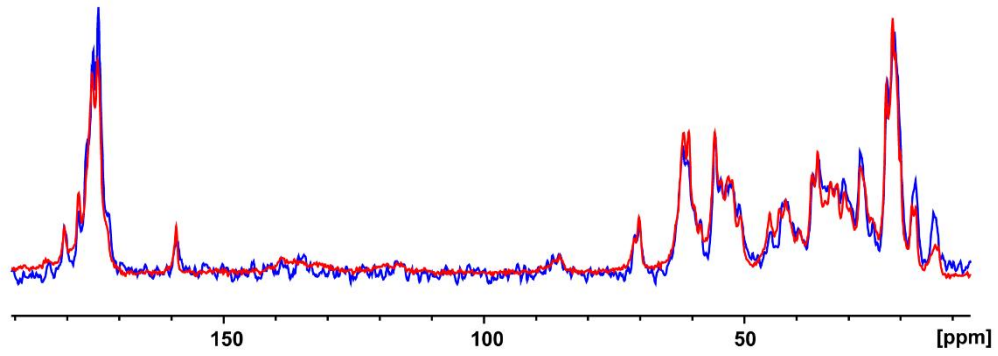

b

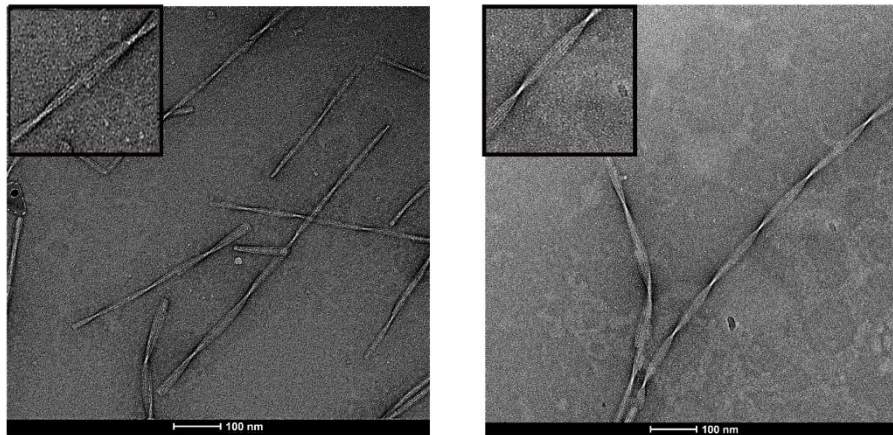

Figure S1: 1D CP spectra **a** and **b** negative stained images of the 1<sup>st</sup> (blue) and 2<sup>nd</sup> generation (red) of G623R fibrils respectively.

$^{13}\text{C} - ^{13}\text{C}$  DARR

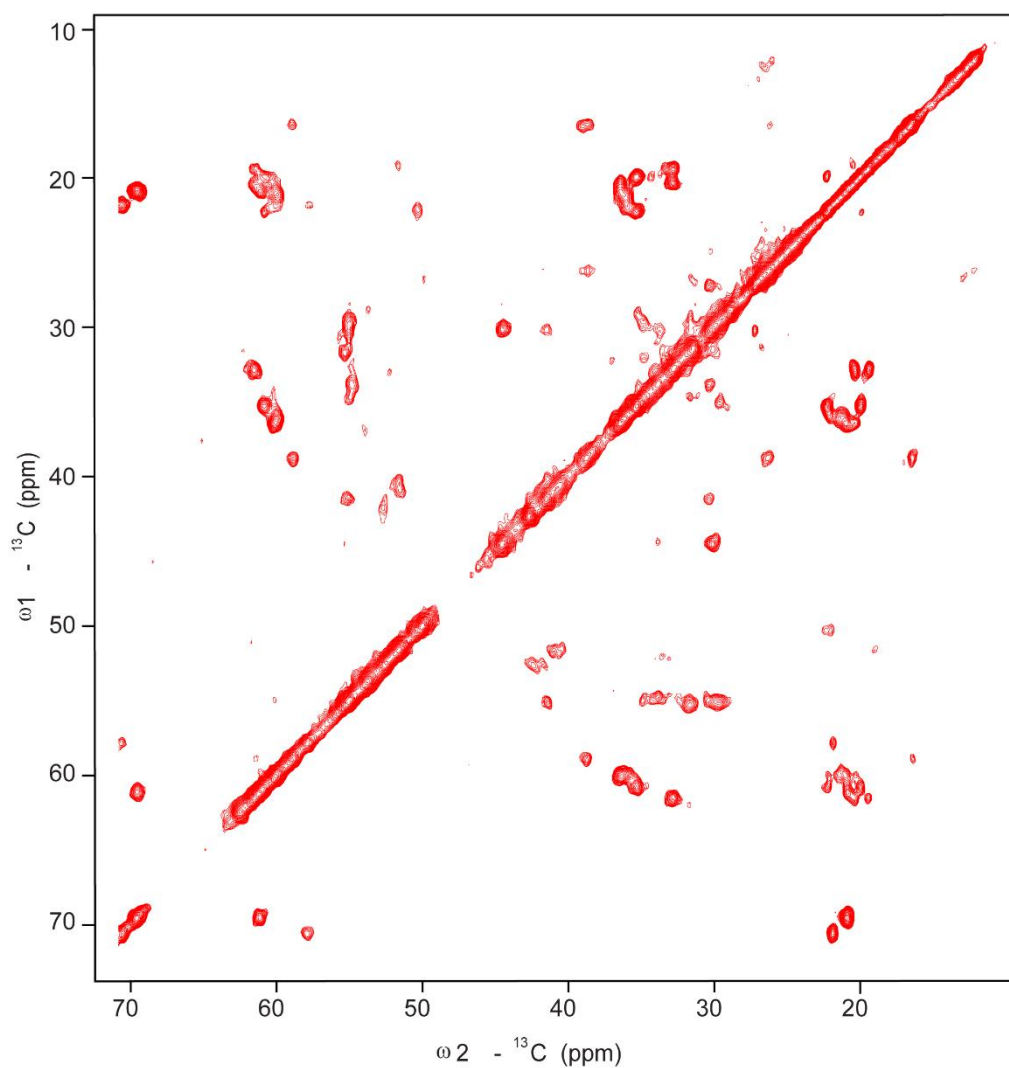

Figure S2: Selected regions of of 2D  $^{13}\text{C}$ - $^{13}\text{C}$  DARR spectrum of  $^{13}\text{C}$ - $^{15}\text{N}$  labeled G623R fibrils with 20 ms contact/mixing time. (Contour level: 1.5e+006, 37, 1.1).

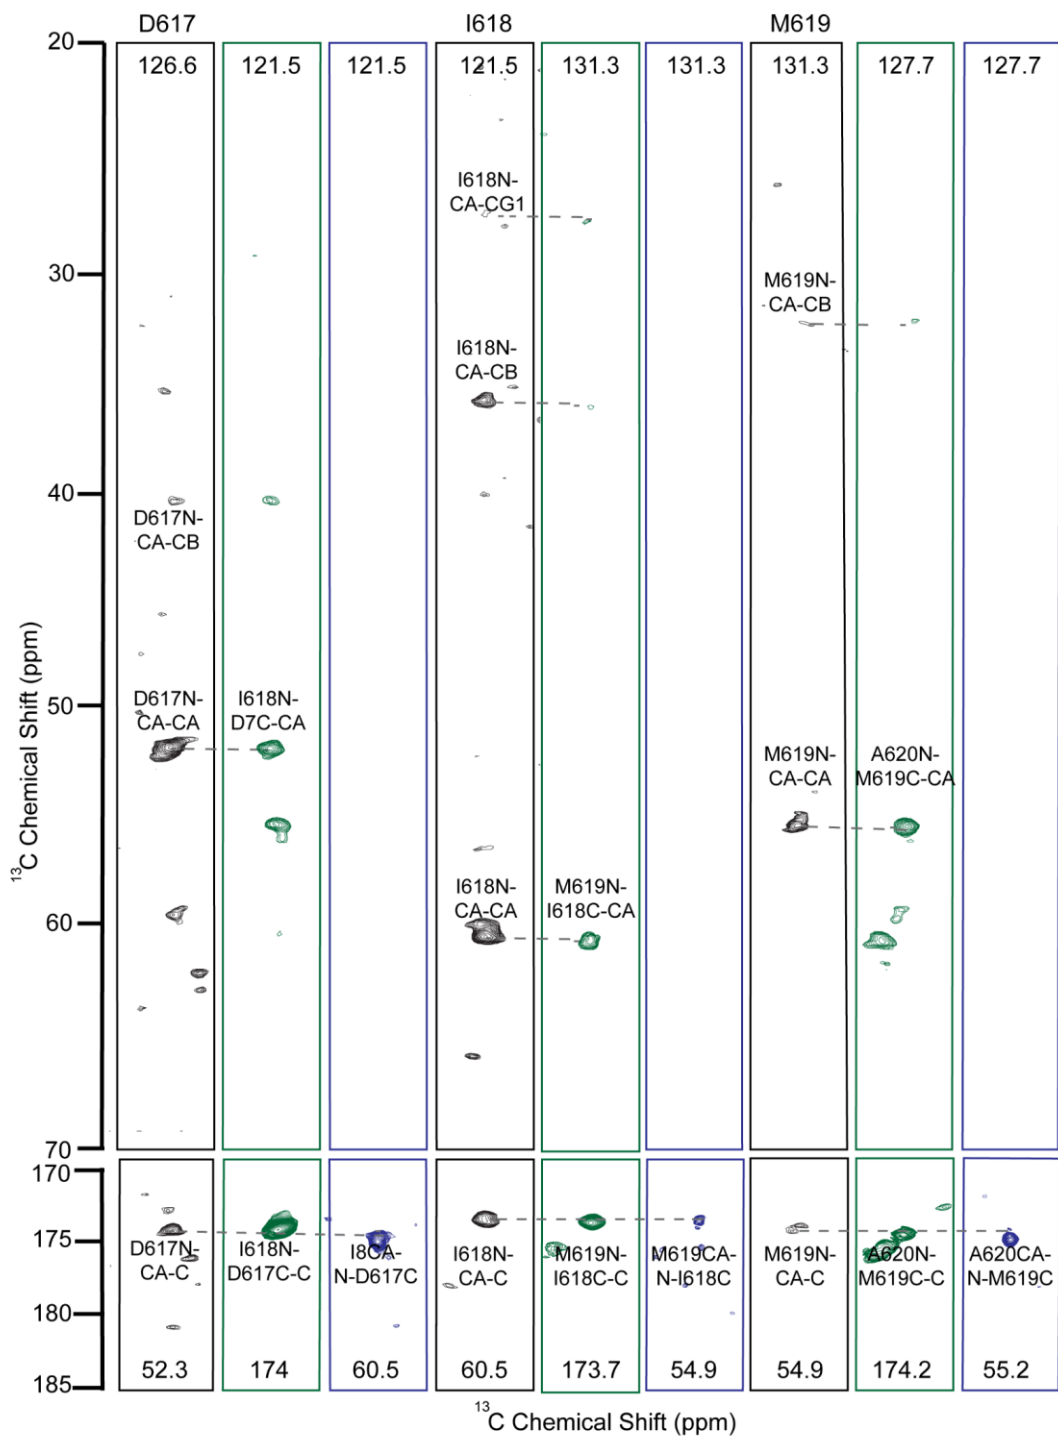

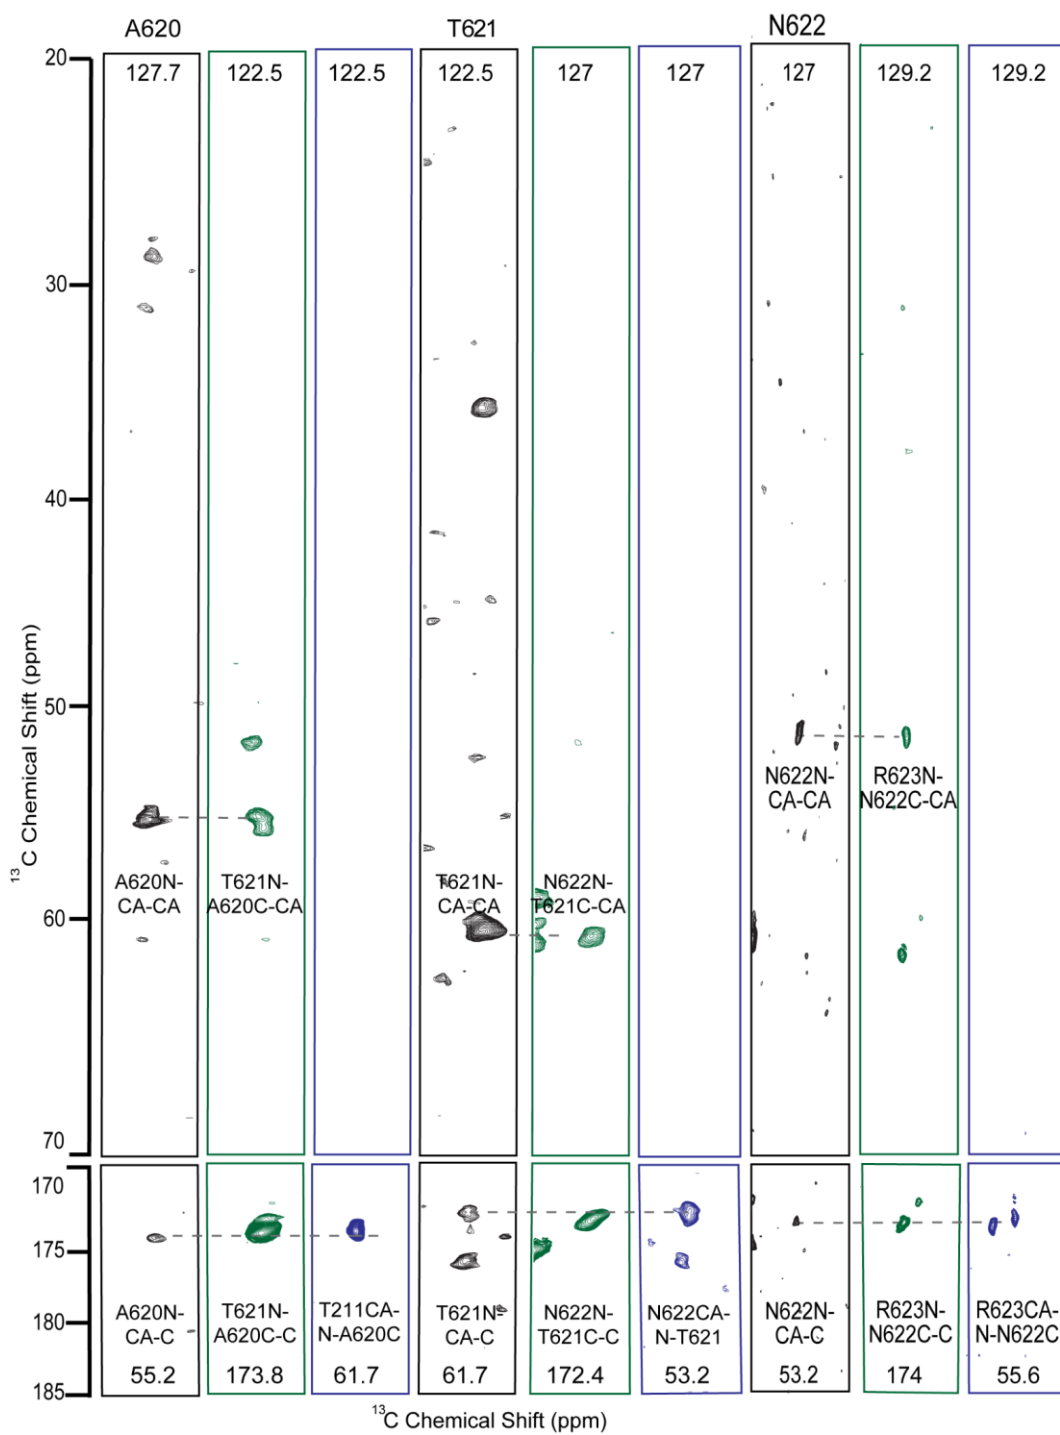

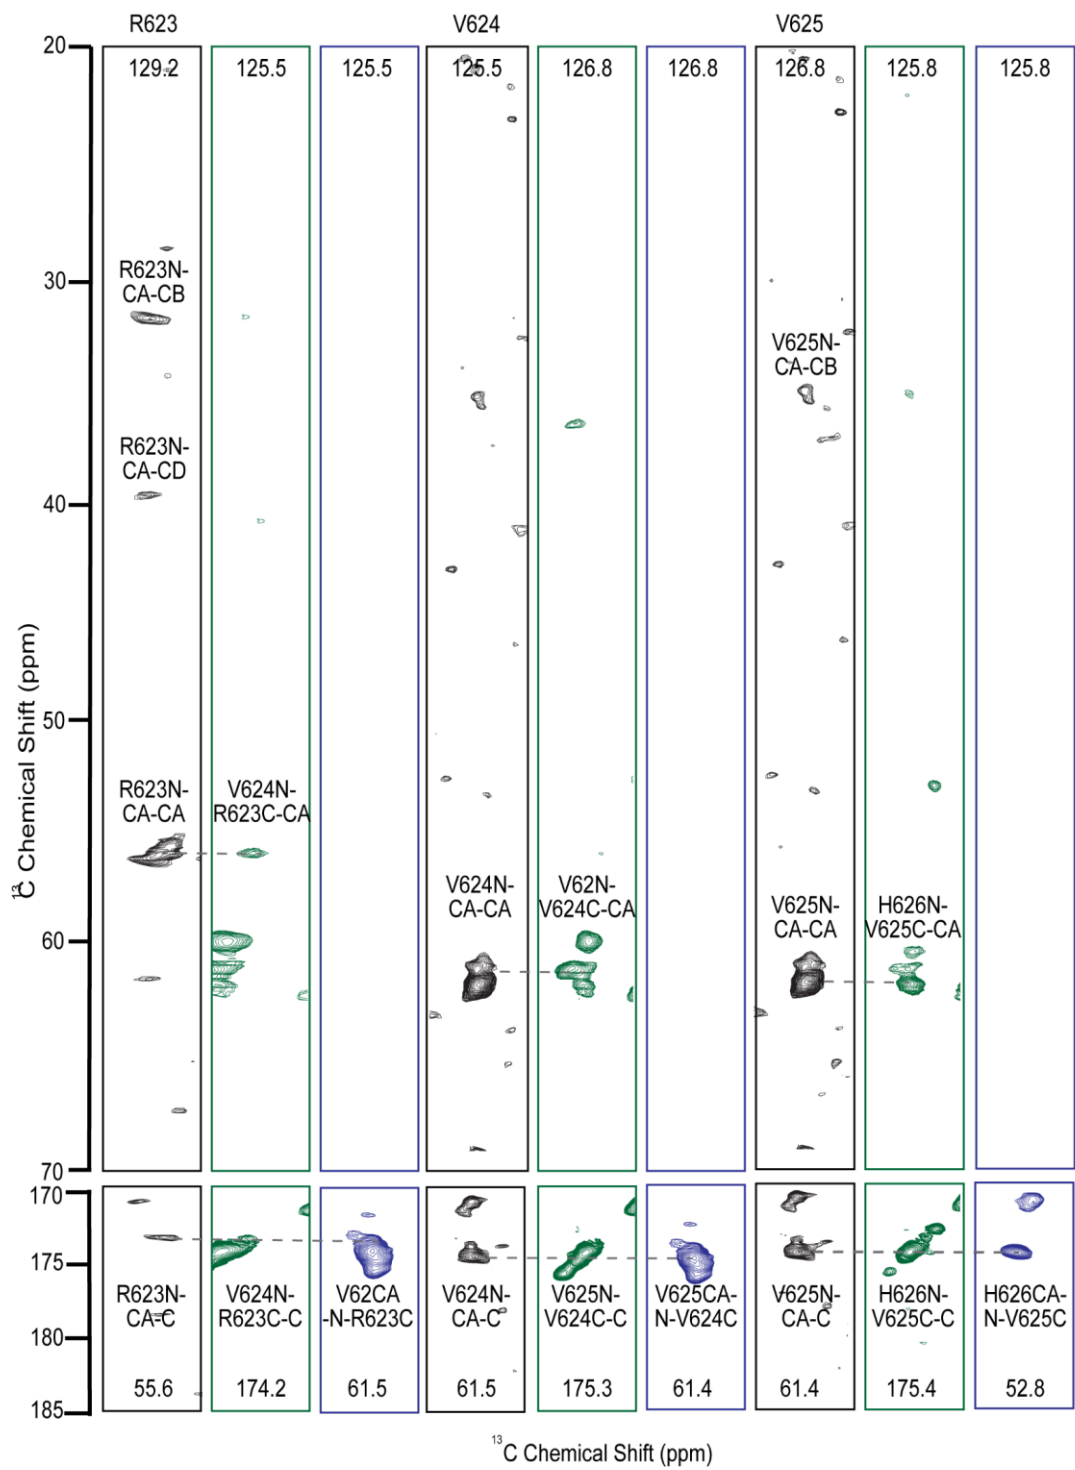

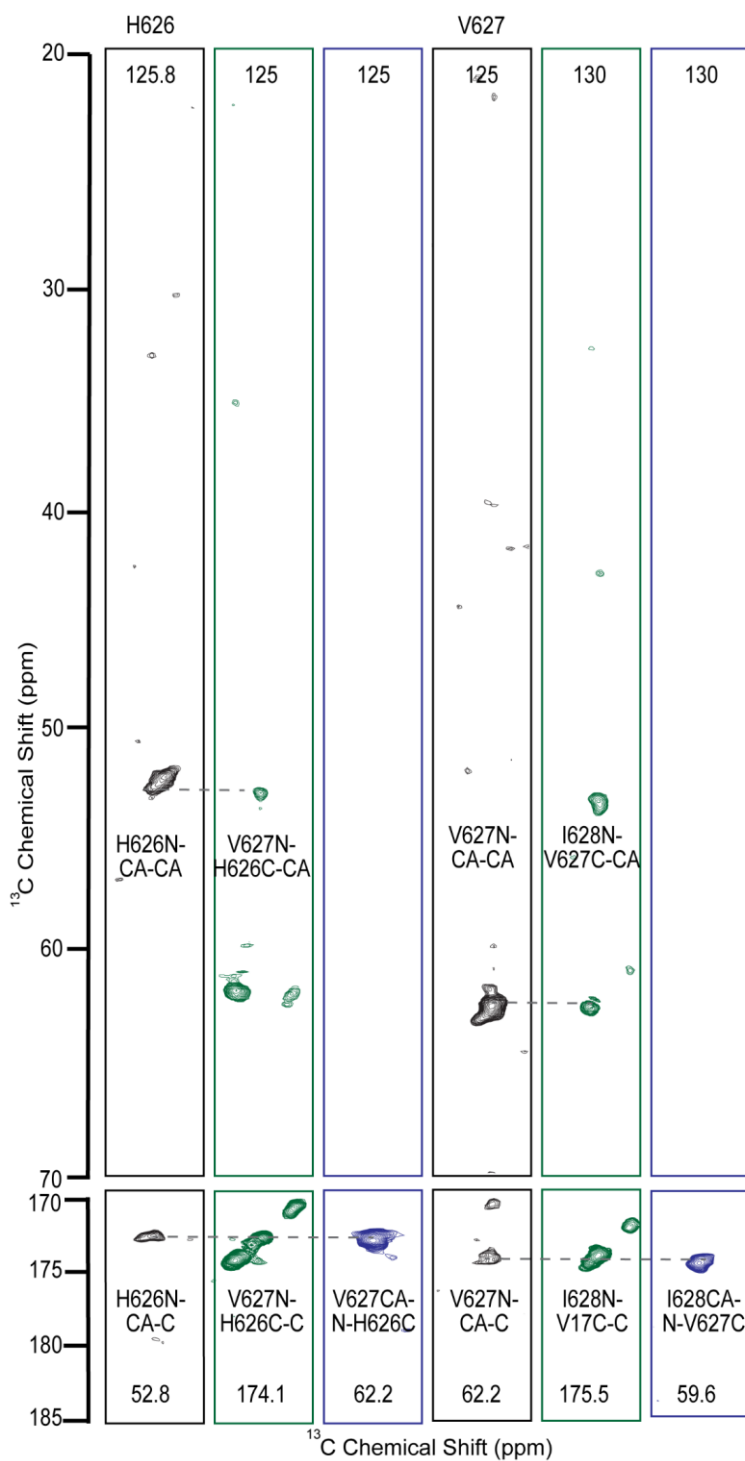

Figure S3: Representative sequential assignment walk for the G623R fibril. Strip plots of 3D NCACX (black), NCOCX (Green) and CANCO (blue) spectra used for sequential assignment for the residues D7 –V17. The sequential lines are shown as grey dashed lines.

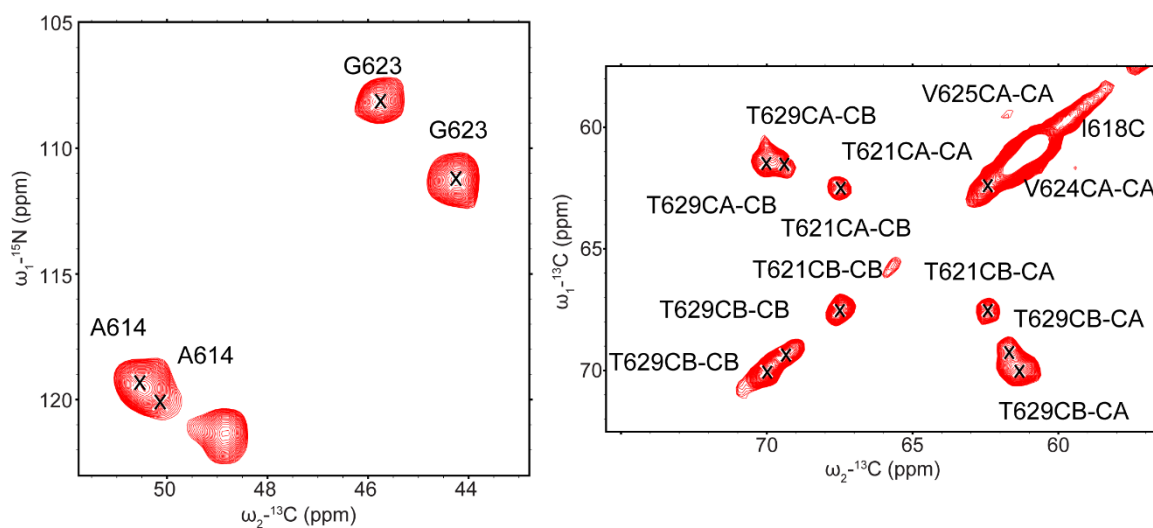

Figure S4: Selected region of 2D  $^{13}\text{C}$ - $^{13}\text{C}$  NCA displaying resonance doubling and 2D  $^{13}\text{C}$ - $^{13}\text{C}$  DARR spectrum of A620D fibrils with 20 ms  $^{13}\text{C}$ - $^{13}\text{C}$  DARR mixing time. (Contour level:  $1.5\text{e}+006$ , 37, 1.1)

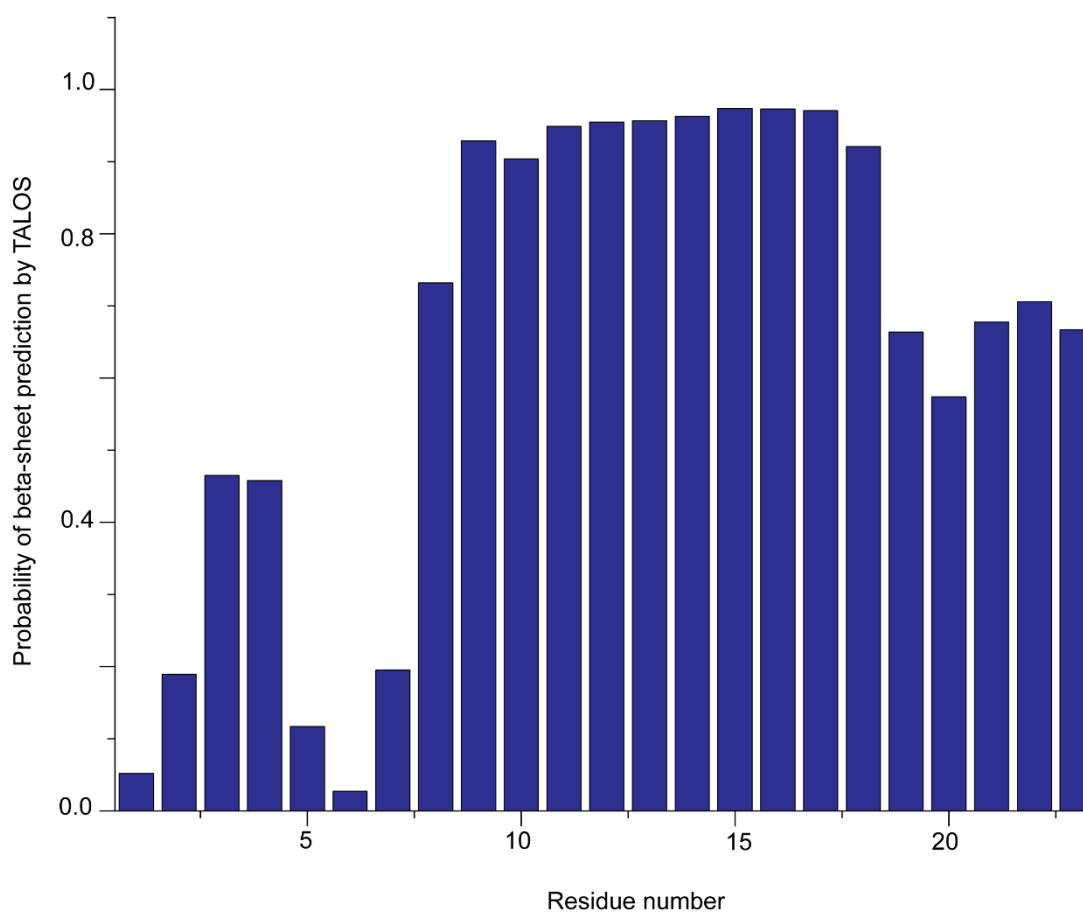

Figure S5: TALOS prediction of the probability of beta-sheet for each residue in G623R fibrils.

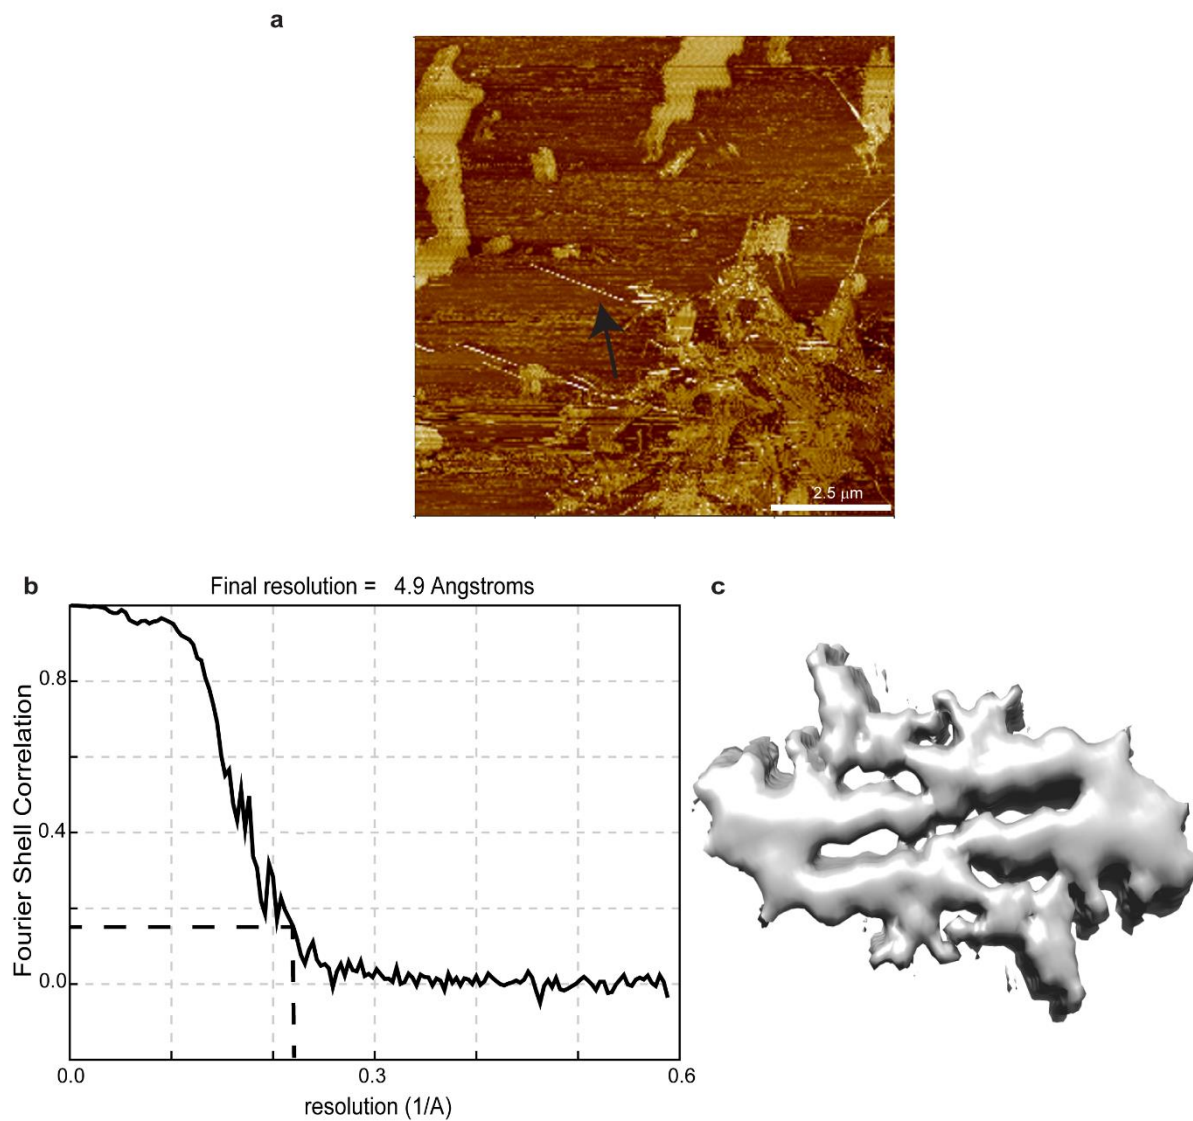

Figure S6: AFM and Cryo-EM data for G623R fibril. **a** The AFM images of the G623R fibril showing the left-handed twist of the fibril shown by the black arrow. **b** The Fourier Shell Correlation (FSC) curve for the electron density calculated without additional symmetry and with near  $2_1$  symmetry. Black dashed lines indicate resolution calculated to be 4.9 Å. **c** The electron density map of G623R fibril.



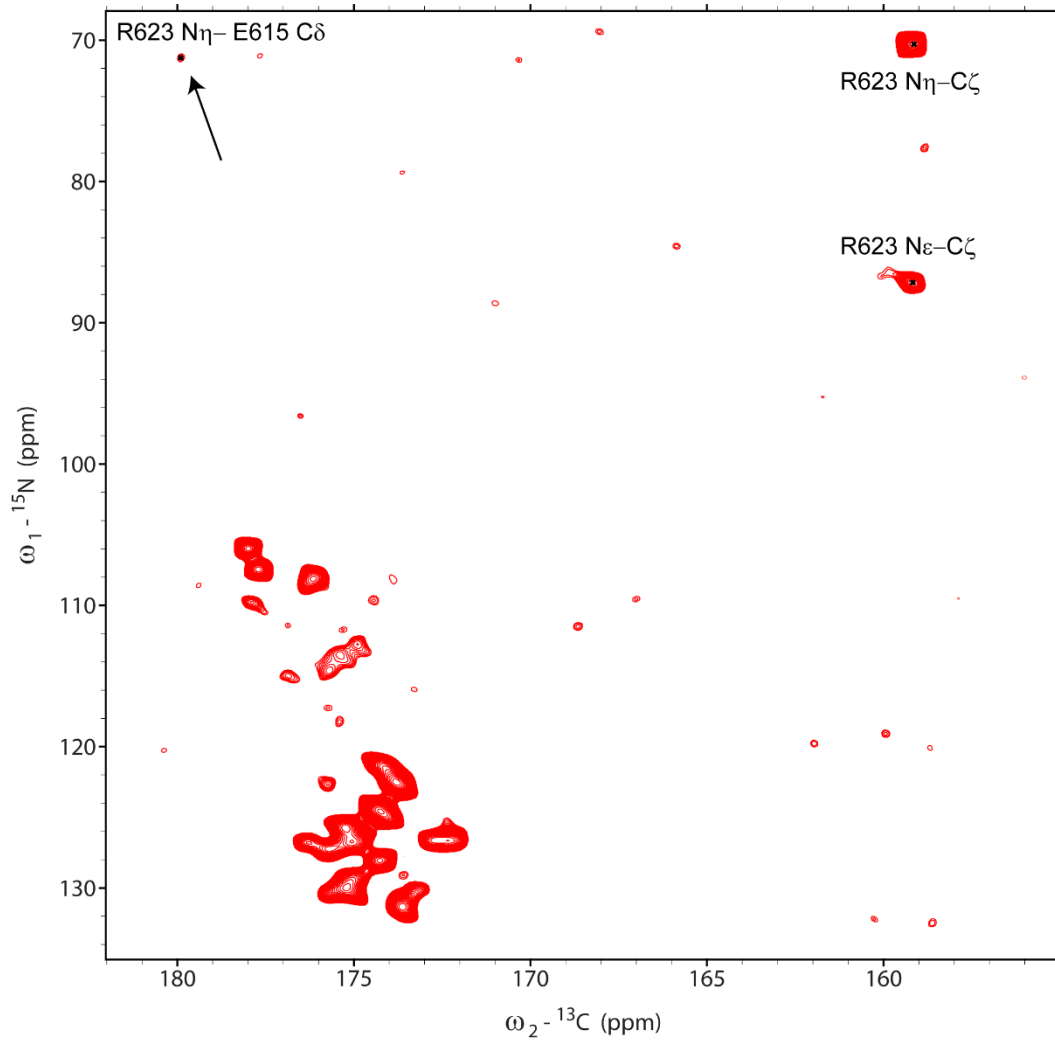

Figure S7: 2D NCO spectra with 20 ms mixing time showing the cross peak between E615 and R623. (Contour level: 1.9e+006, 37, 1.1)

## Double mutant (R623D, D617R) of TGFB1p peptide EPVAEPRIMATNDVVHVITNVLQ

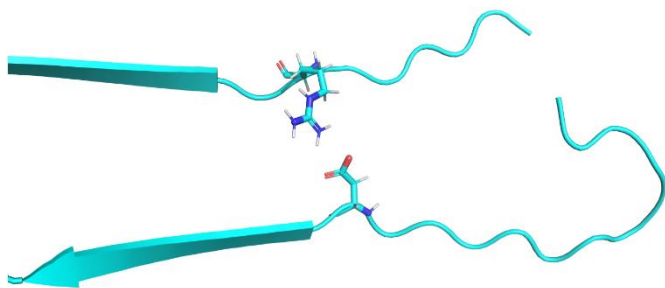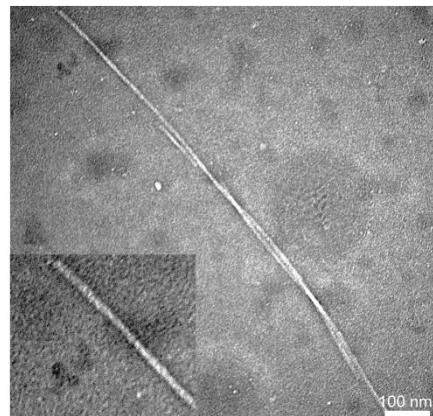

Figure S8: The peptide sequence of the double mutant (R623D, D617R) TGFB1p peptide, cartoon representation and the TEM image of the fibril formed by double mutant peptide.

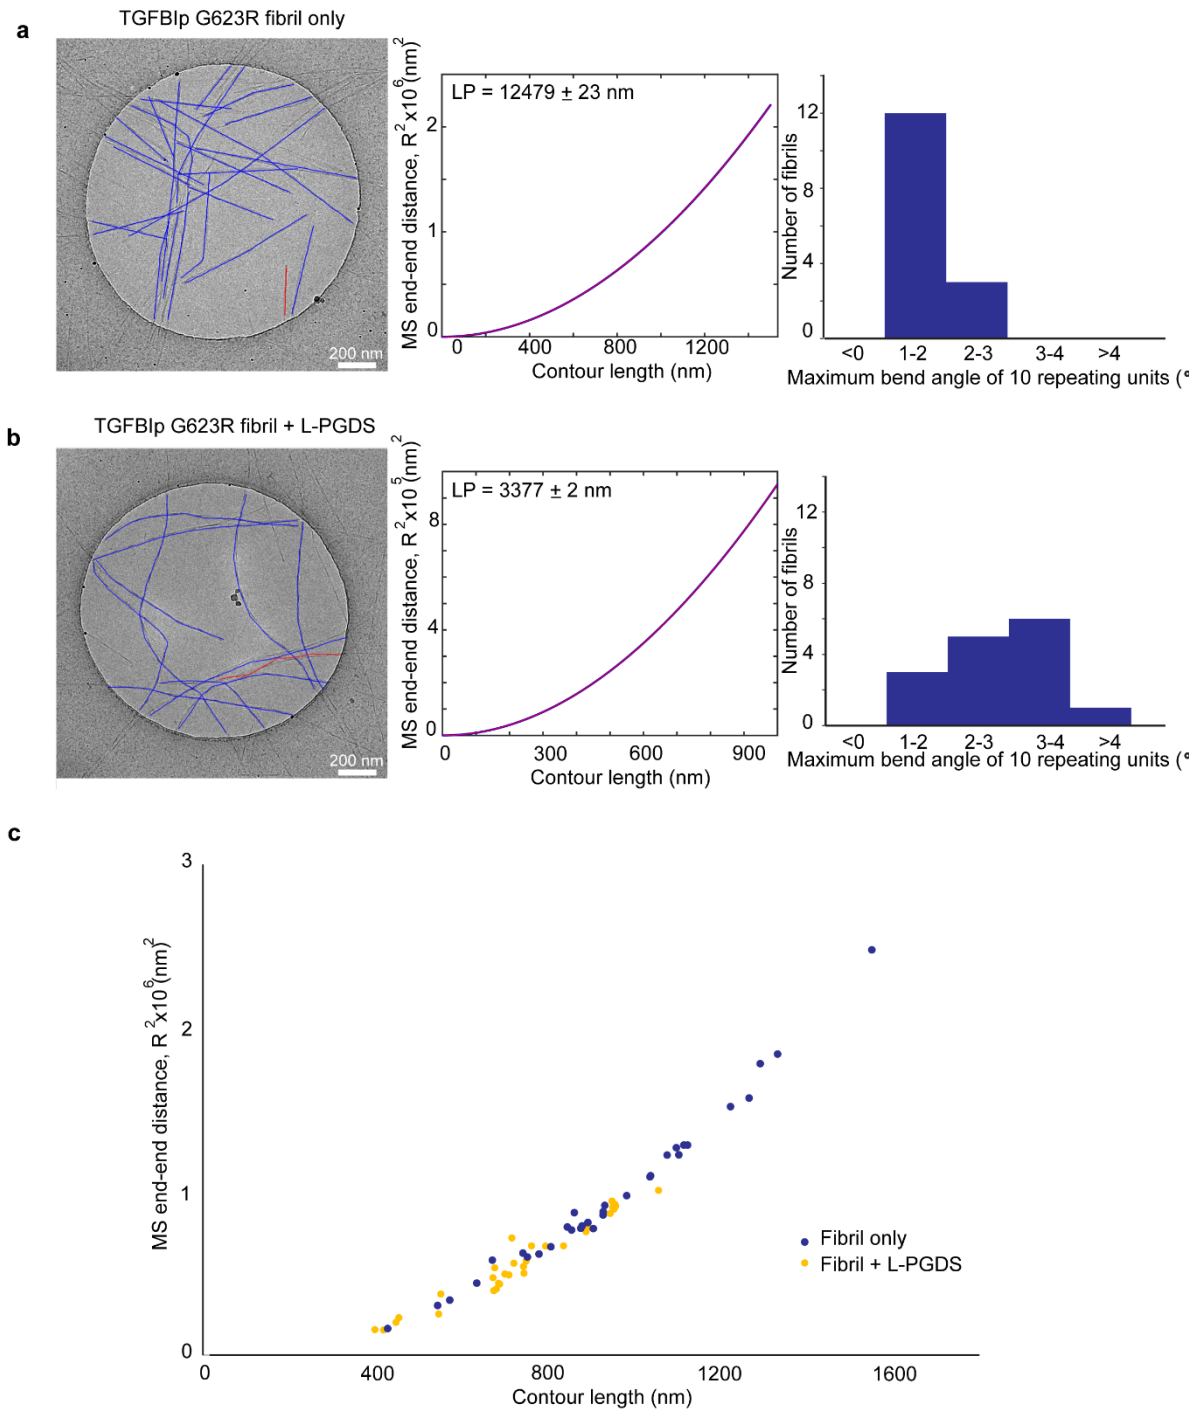

Figure S9: Persistence length and distribution of the maximum bend (curvature) angles of 10 repeating units in the cryo-EM field of view calculated using the FiberApp<sup>1</sup> for **a**, G623R fibrils and **b** G623R fibril + L-PGDS complex. **c** The linear plot of end to end distance,  $R^2$ , against contour length of the fibril in absence or presence of L-PGDS.

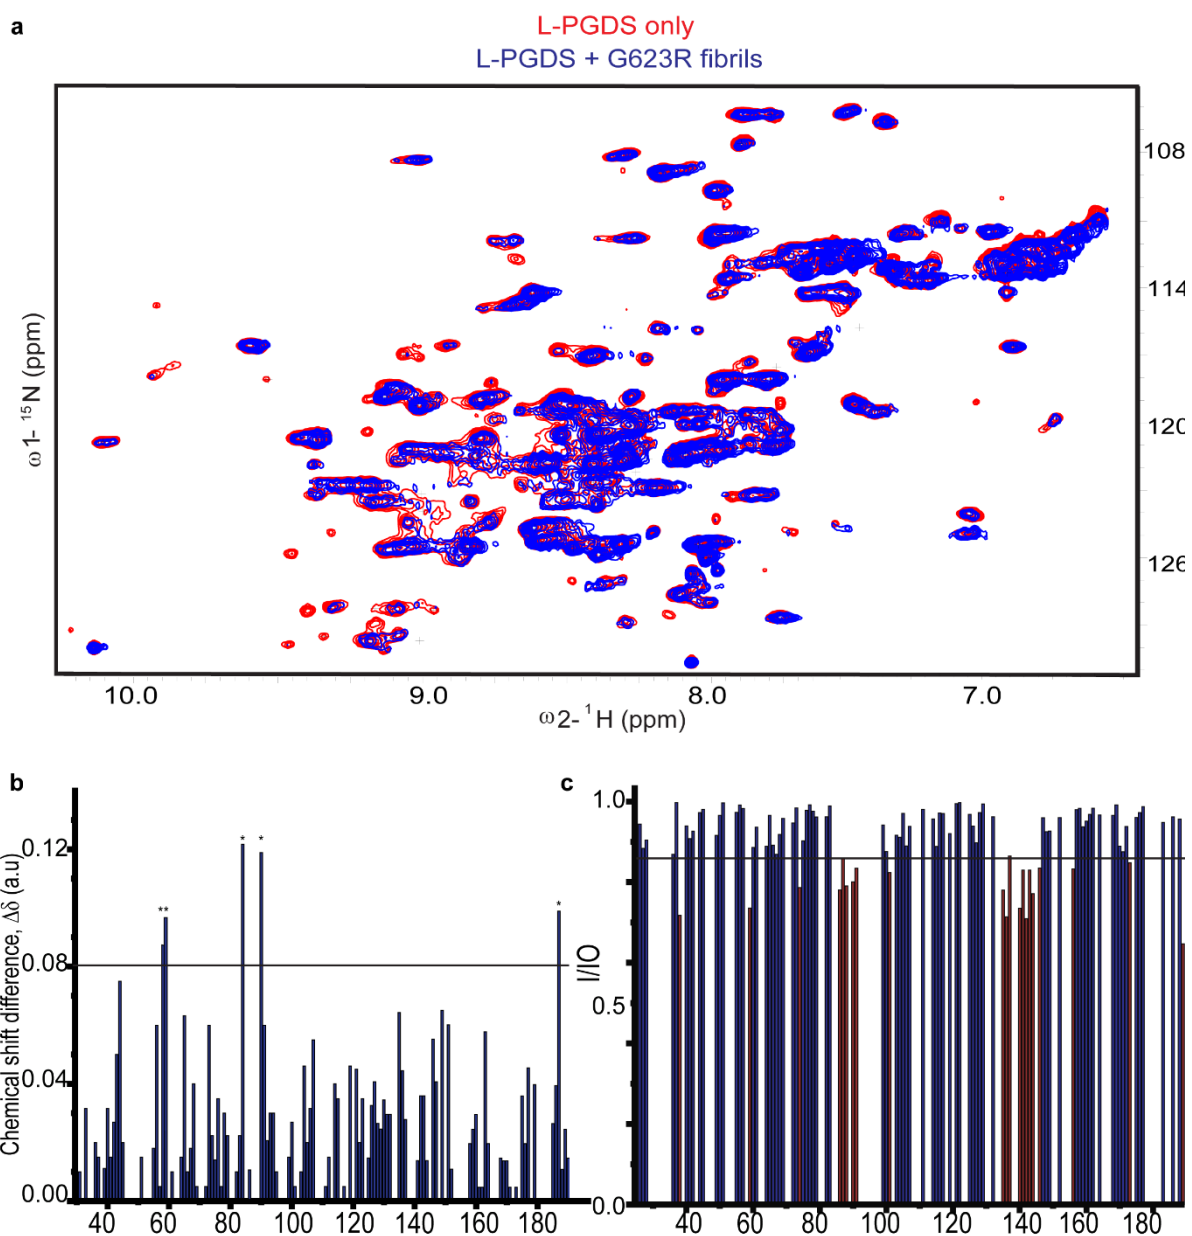

**Figure S10: Solution NMR spectra of the interaction between L-PGDS and G623R fibril.** **a**  $^1\text{H}$ - $^{15}\text{N}$  HSQC spectra of WT L-PGDS (red) and L-PGDS + G623R fibril (blue). **b** Graph showing chemical shift perturbation for  $^{15}\text{N}$  L-PGDS in the presence of G623R fibrils. Residues that showed significant chemical shift perturbation are highlighted in asterisks (\*). **c** Graph showing changes intensity ratio ( $I/O$ ) comparing L-PGDS alone and L-PGDS in the presence of G623R fibrils. Residues showing  $I/O < 0.8$  are highlighted in red.  $IO$  is the intensity of free L-PGDS and  $I$  is the intensity of L-PGDS and G623R complex.

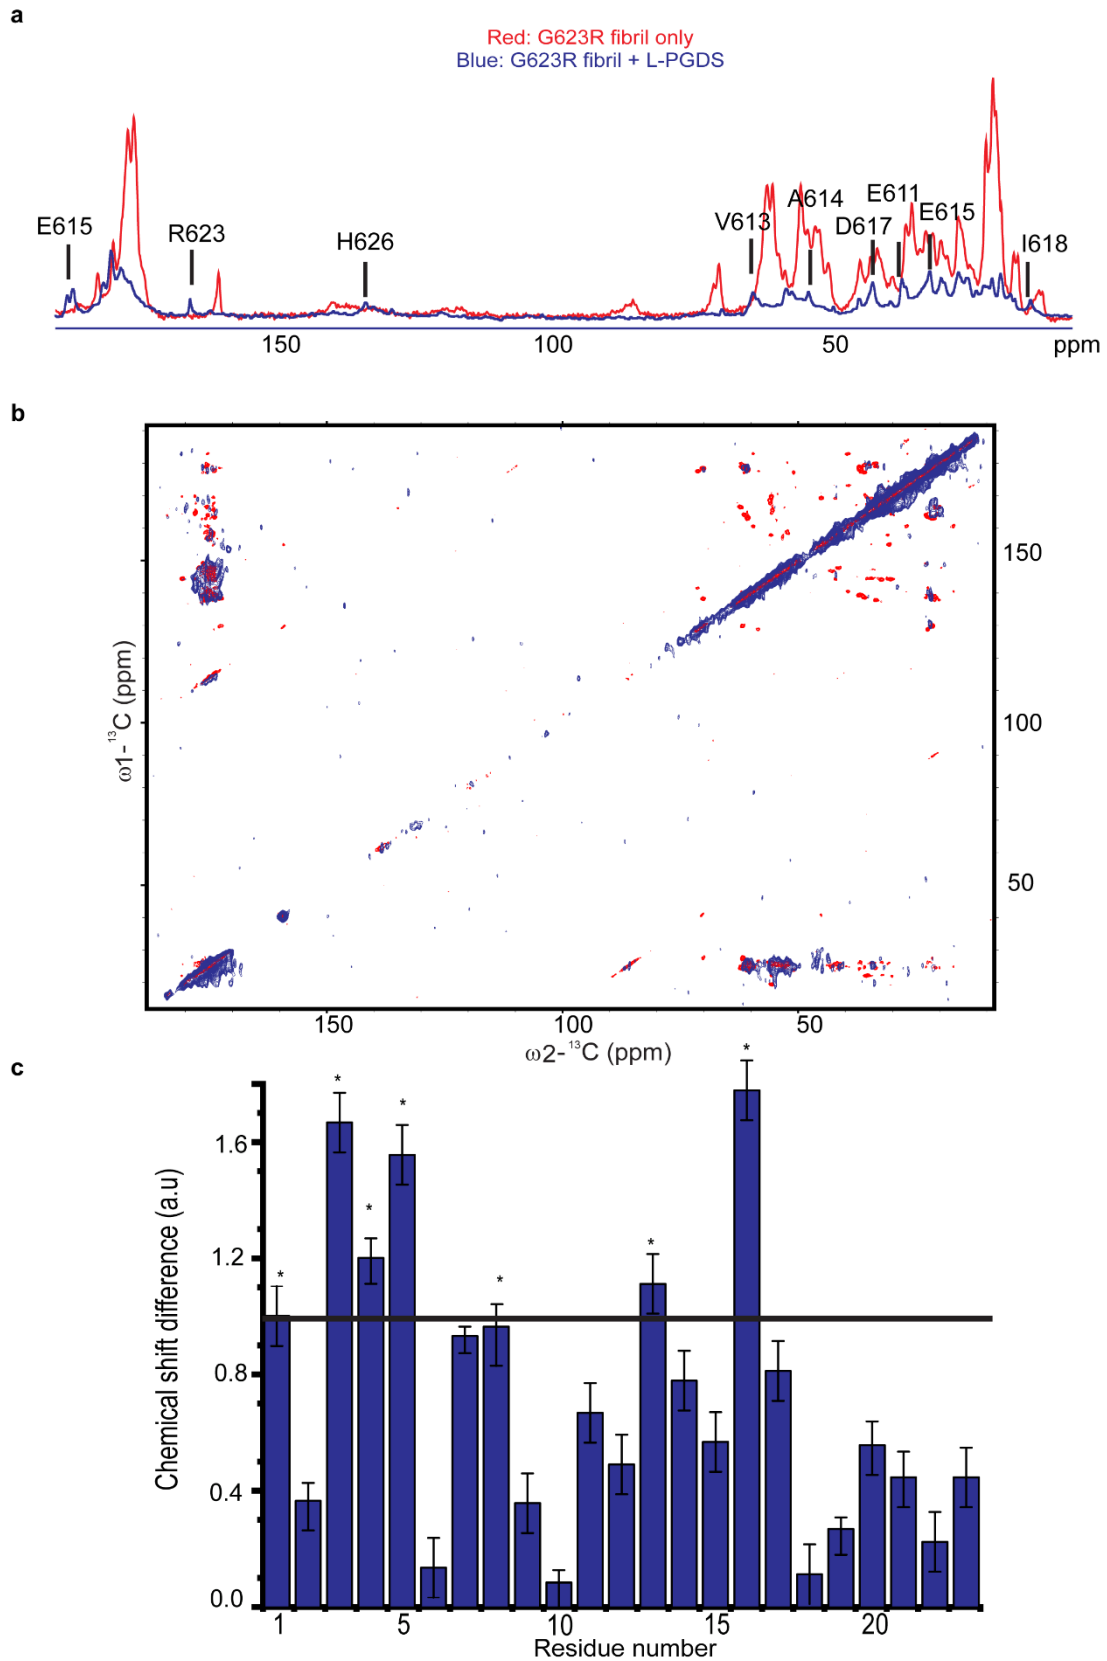

Figure S11: ssNMR spectra of the interaction between G623R fibril and L-PGDS. **a** 1D  $^{13}\text{C}$  CP spectra **b**  $^{13}\text{C}$ - $^{13}\text{C}$  DARR spectra of G623R fibril (red) and G623R fibrils + L-PGDS (blue) with 20 ms  $^{13}\text{C}$ - $^{13}\text{C}$  DARR mixing time. (Contour level:  $4\text{e}+006$ , 37, 1.1). **c** Graph showing chemical shift perturbation for  $^{13}\text{C}$ - $^{15}\text{N}$  G623R fibril in the presence of L-PGDS.

Residues that showed significant chemical shift perturbation are highlighted in asterisks (\*). Error bars correspond to the chemical shift variation measured from three different readings from the same experiment and number of experiment (n) =1.

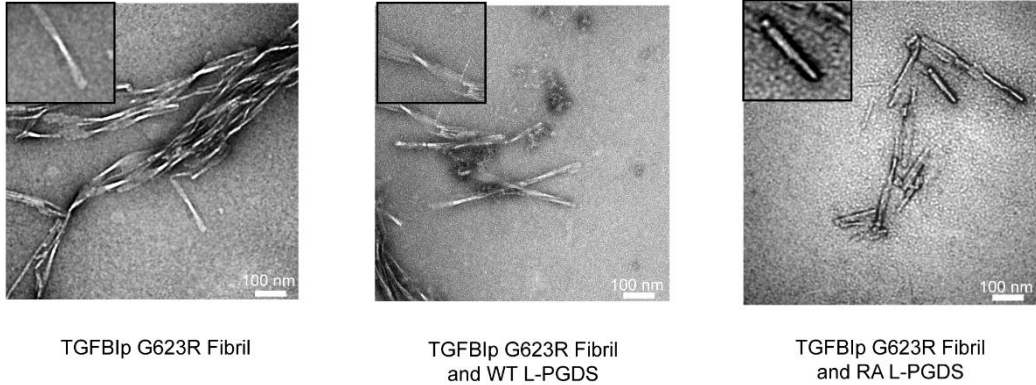

Figure S12: Representative negative stain EM images of G623R fibril control incubated in PBS buffer only, WT L-PGDS and RA L-PGDS respectively.

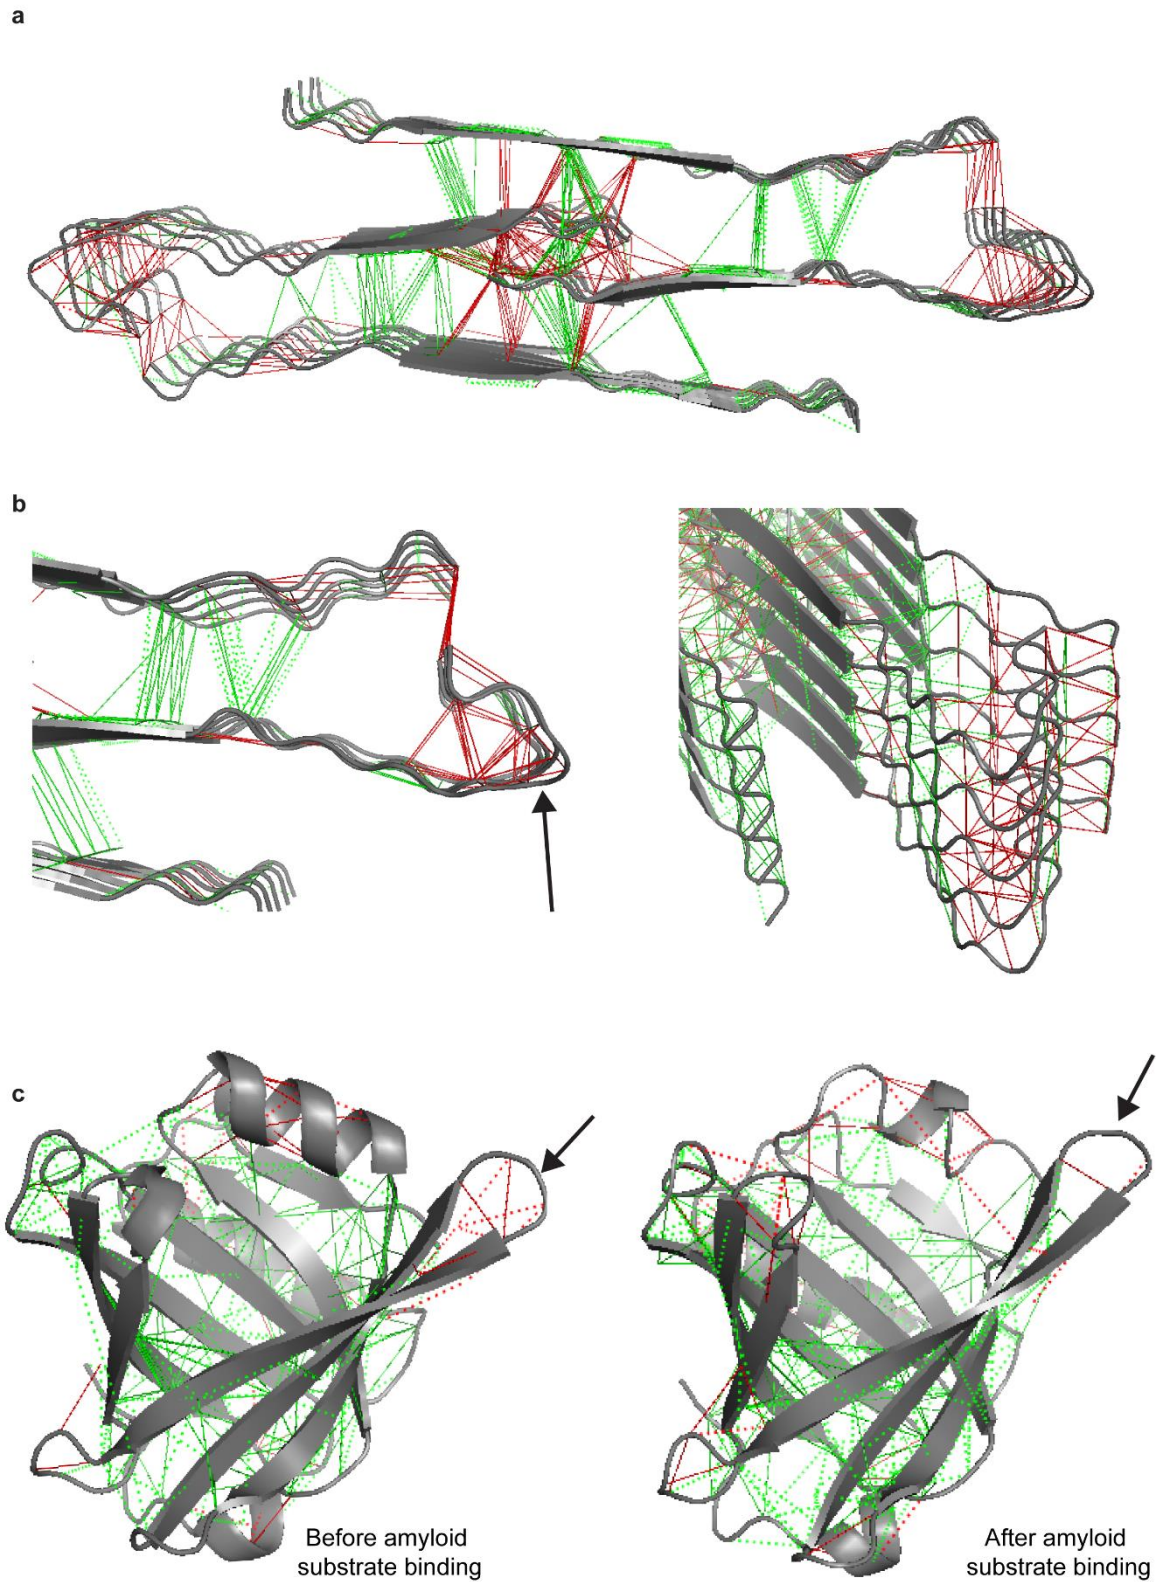

Figure S13: Frustration levels predicted by the online server, Frustratometer<sup>2</sup> **a** G623R fibrils, **b**  $\beta$  turn region of the G623R fibril and **c** L-PGDS. The red lines represent the highly frustrated regions (as shown by the black arrow), and the green lines represent the minimally frustrated regions.

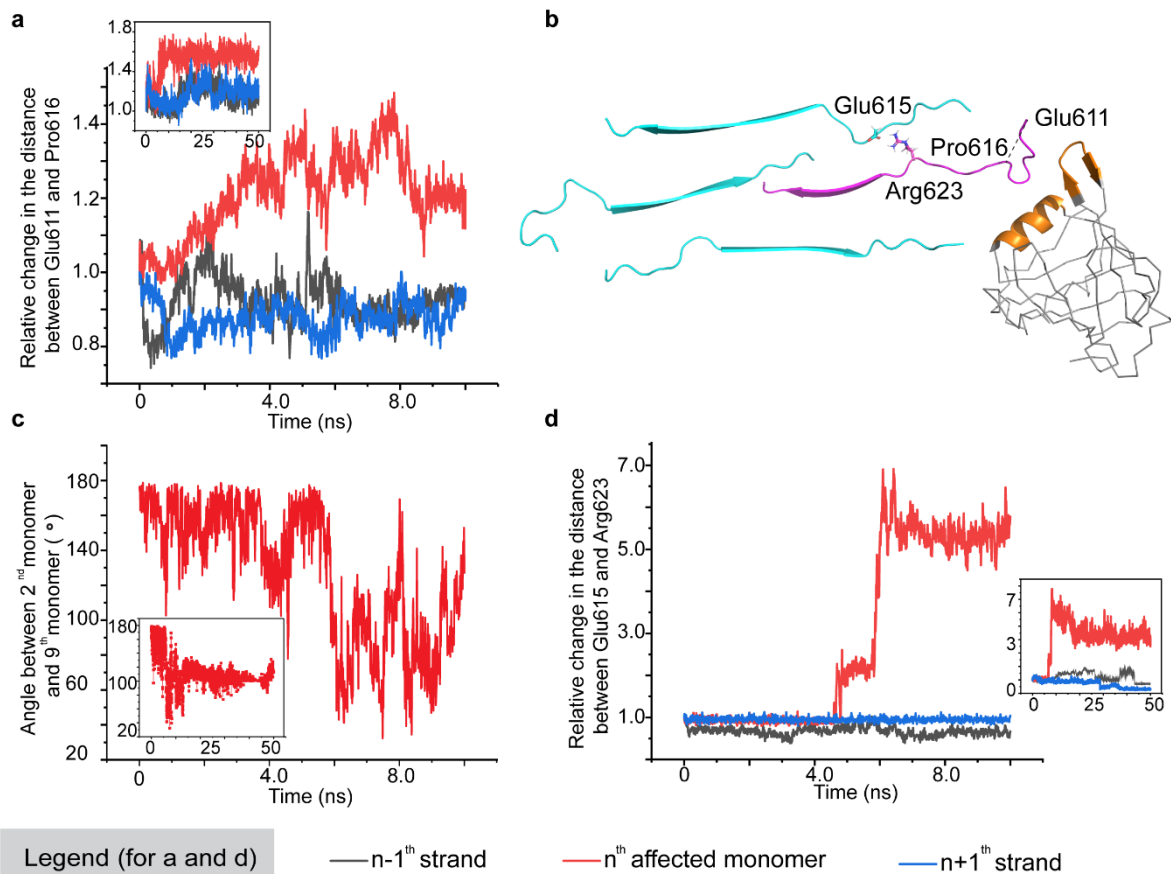

Figure S14: MD simulation of G623R fibril and L-PGDS. **a** Relative change in the distance between residue pairs Glu611-Pro616 to the Glu611-Pro616 distance at  $T=0$ ,  $n \geq 3$  independent experiments. **b** 3D representation of the  $\beta$ -turn flipping out event. The interacting helix and loop of L-PGDS are highlighted in orange and the affected monomer is highlighted in magenta. **c** The angle between the normal to the planes of 2<sup>nd</sup> and 9<sup>th</sup> monomer defined by CA of A10, N12 and H16 as shown in Fig. S19. **d** Relative change in the distance between averaged heavy-atom positions of E615 and R623 to the E615 and R623 distance at  $T=0$ . The insets in A, C and D shows the entire 50 ns MD trajectory.

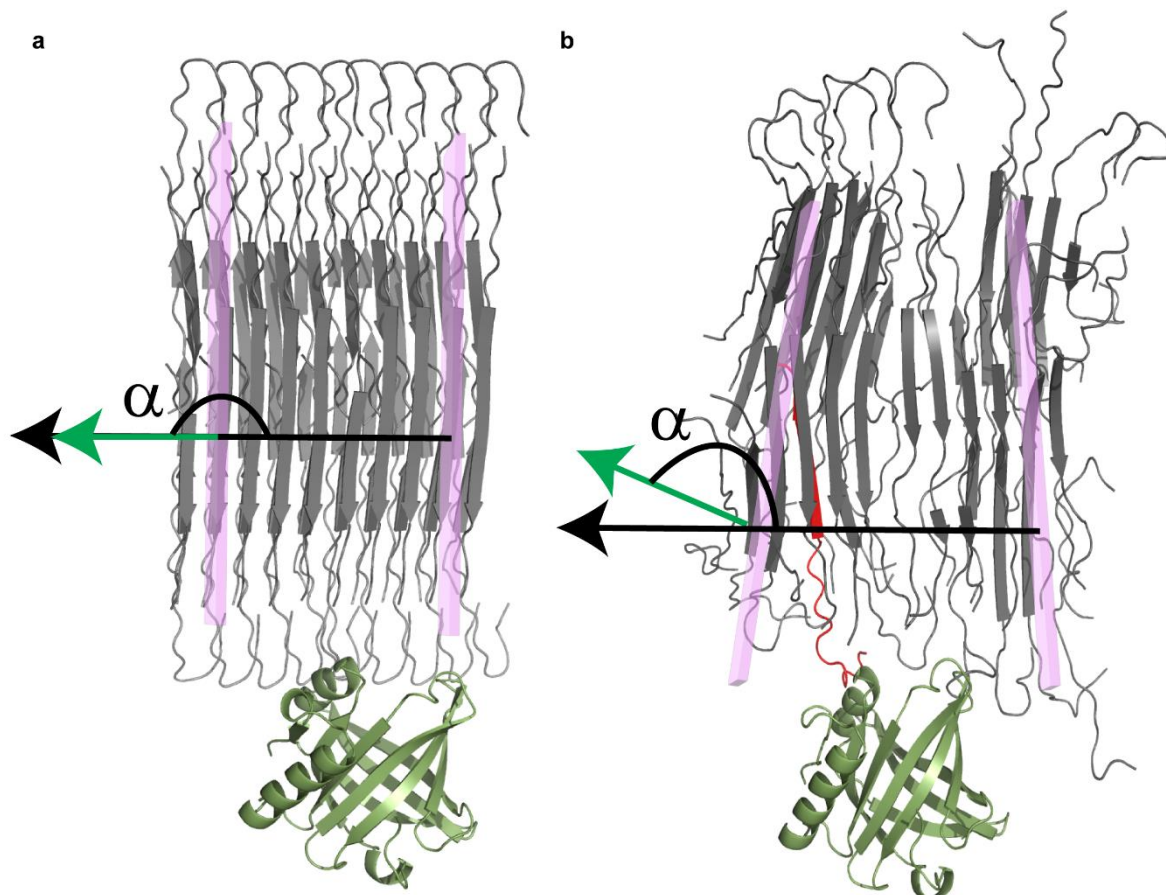

Figure S15: MD simulation snapshots taken at T=0 and T=6 ns. The angle,  $\alpha$ , is defined between the normal to the planes of 2<sup>nd</sup> and 9<sup>th</sup> monomer defined by CA of A10, N12 and H16 (pink). The black and green arrows represent the normal of the plane of the 2<sup>nd</sup> and 9<sup>th</sup> monomer. The interacting monomer is highlighted in red.



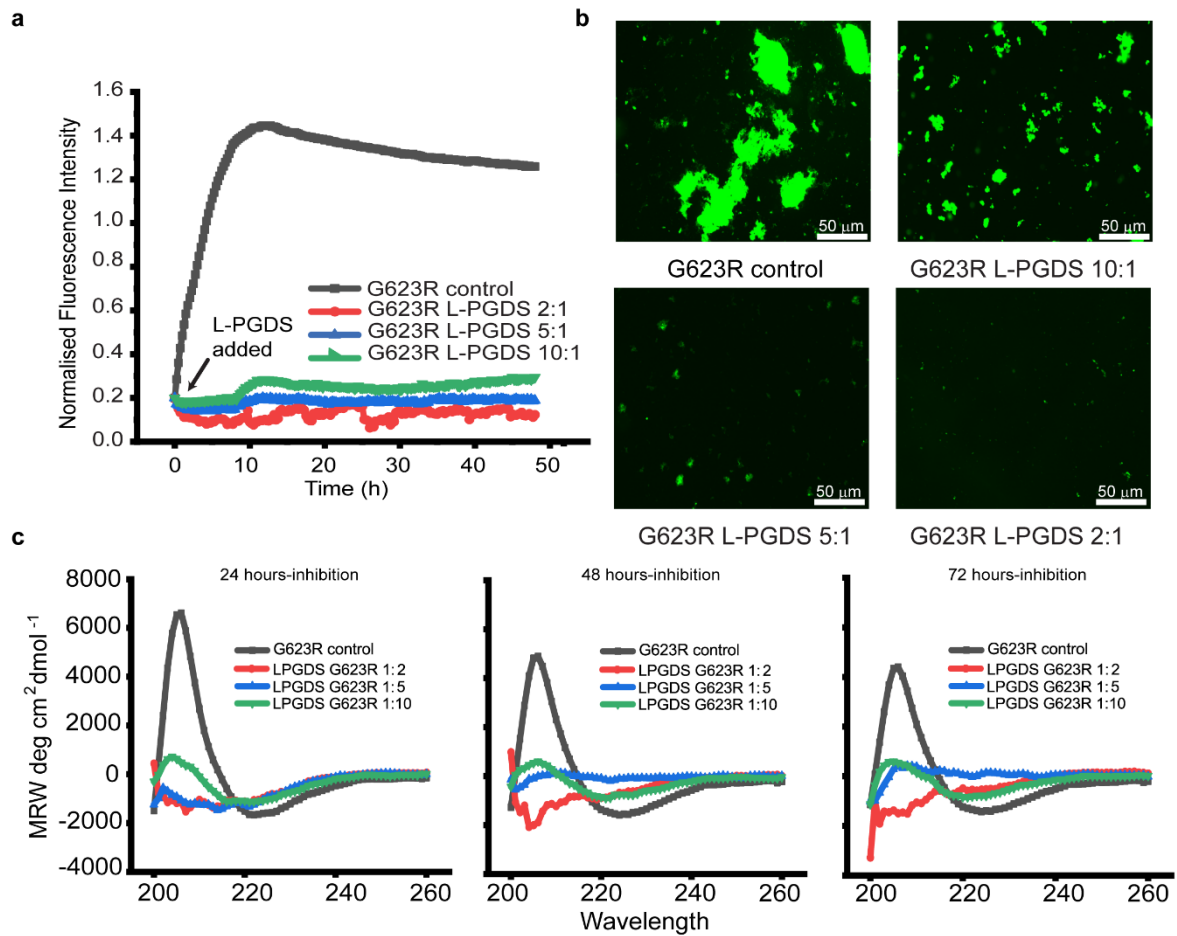

Figure S16: The inhibitory effects of L-PGDS on G623R peptides. **a** Long hour kinetic ThT assays. **b** Representative fluorescence microscopy images showing the inhibitory effects of L-PGDS on G623R peptides after 72h incubation. **c** Circular Dichroism spectra showing the aggregation inhibitory effects of L-PGDS on G623R peptides.

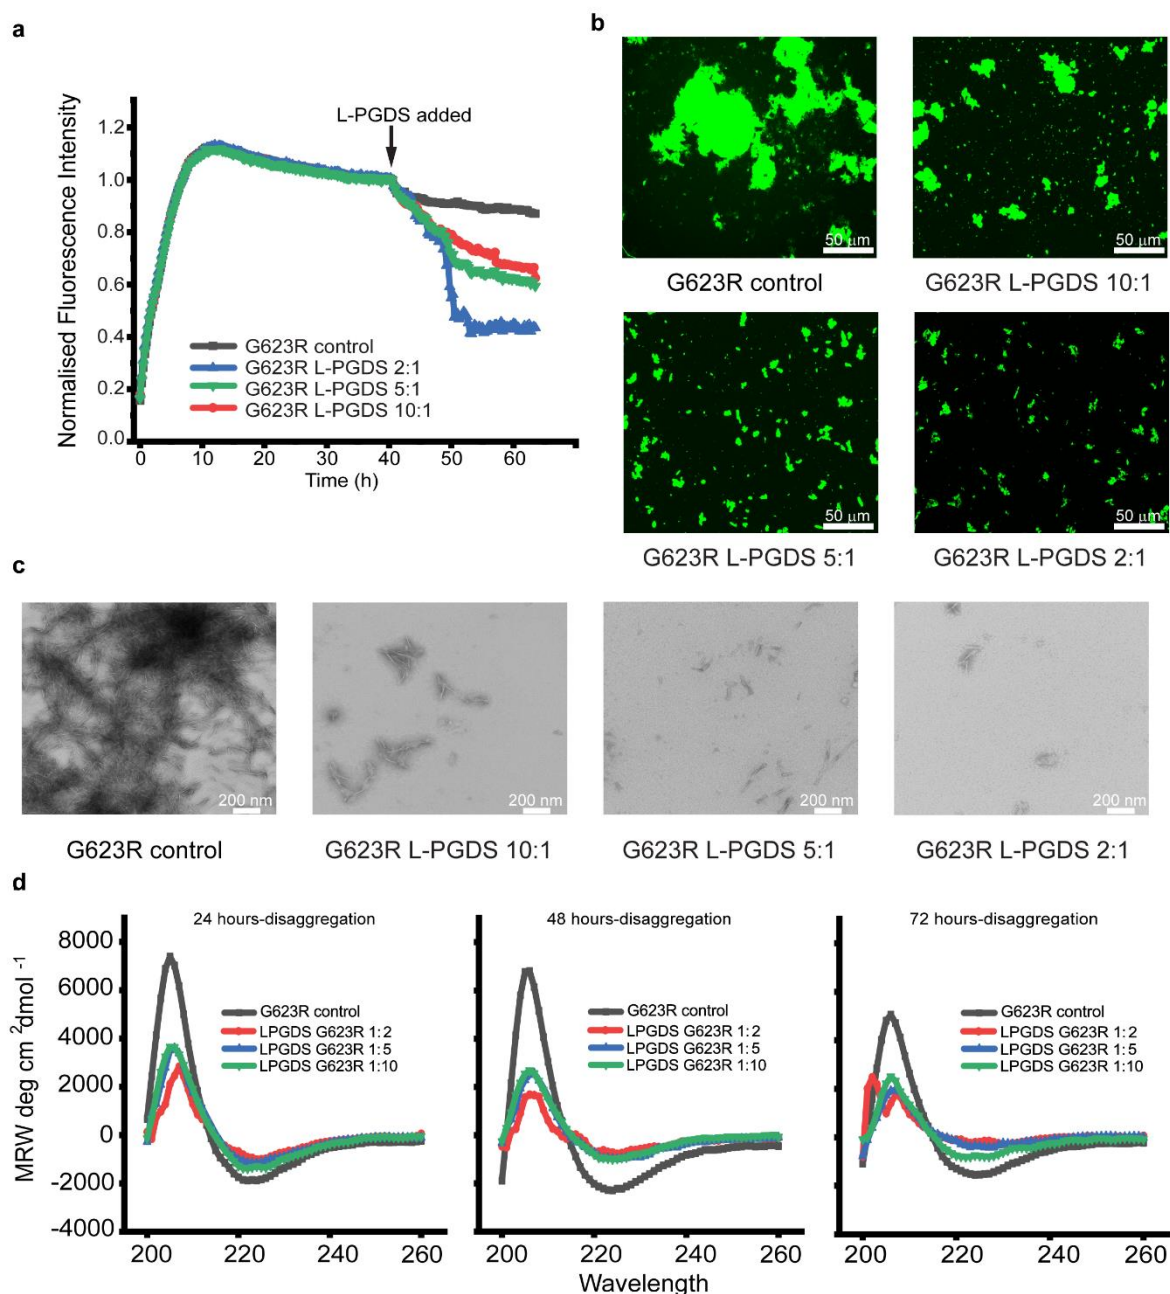

Figure S17: The amyloid disaggregation effects of L-PGDS on preformed G623R fibrils. **a** Long hour kinetic ThT assays. **b** Representative fluorescence microscopy images showing the amyloid disaggregation effects of L-PGDS on G623R fibrils after 72h incubation. **c** Representative negatively stained EM images showing the amyloid disaggregation effects of L-PGDS on G623R fibrils after 72h incubation. **d** Circular Dichroism spectra showing the fibril disaggregation effects of L-PGDS on preformed G623R fibrils.

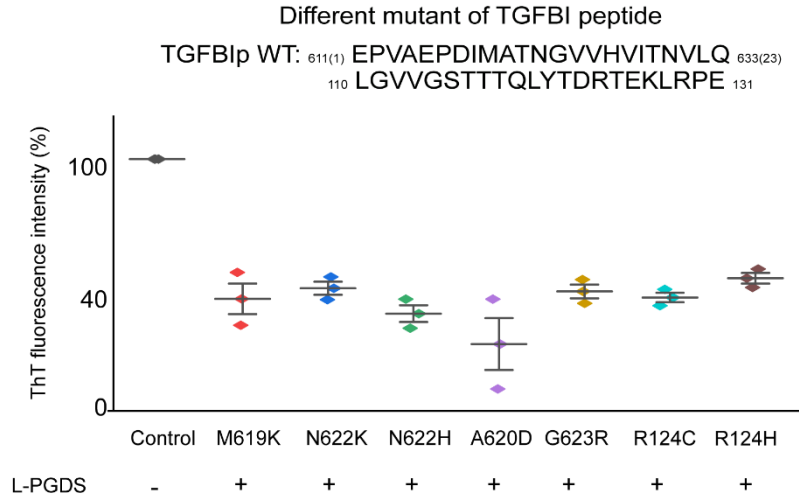

Figure S18: Amyloid disaggregation effects of L-PGDS for the sequence variants of TGFBIp associated with amyloid type corneal dystrophy phenotype<sup>3</sup>. The ThT fluorescence intensity is normalised to the ThT fluorescence of the fibril control for each mutant. The WT TGFBIp sequence of the 611-633 and 110-131 regions are listed on top of the graph. Number of experiment(n) = 1 with triplicates for each condition and S.E.M calculated for the triplicates.

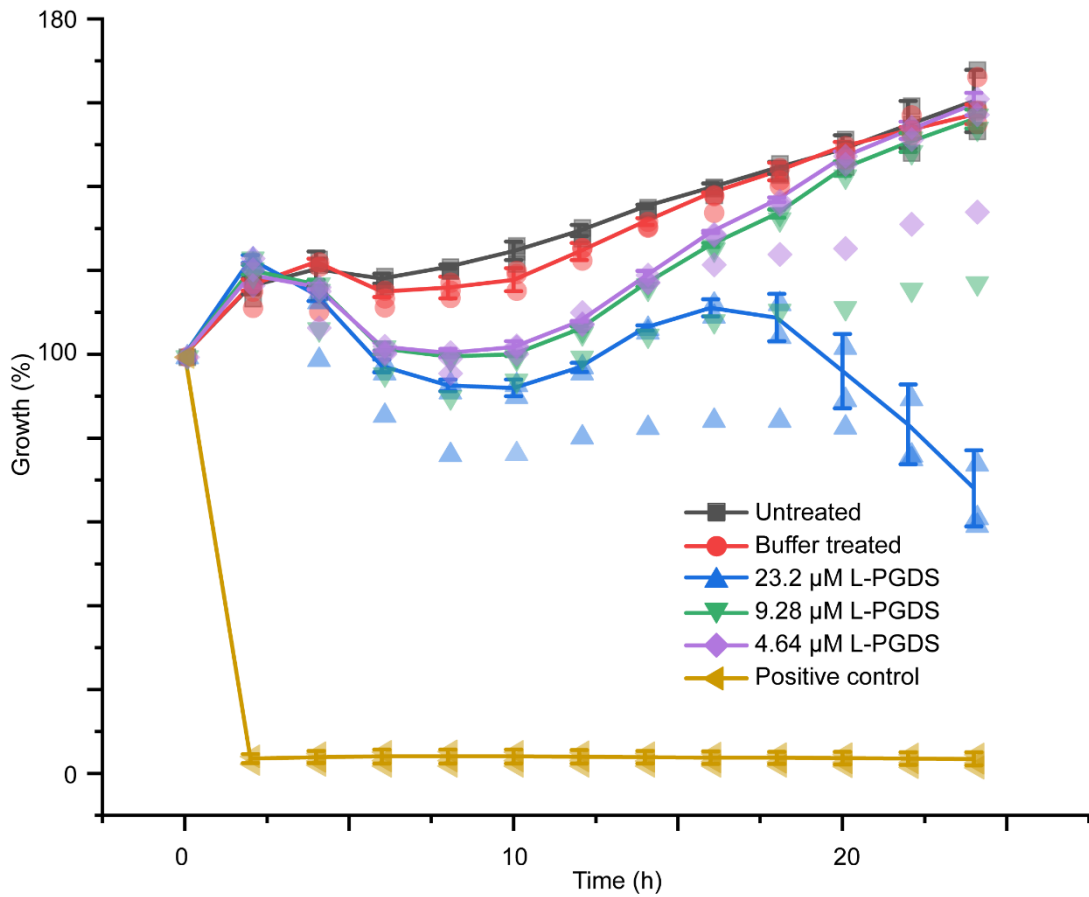

Figure S19: Cytotoxicity of WT L-PGDS at different concentrations, buffer only, untreated (UT) and positive control (DMSO) on cultured human corneal fibroblasts. Number of

experiment(n) = 1 with triplicates for each condition and S.E.M calculated for the triplicates.

+ PBS only

+ L-PGDS in PBS

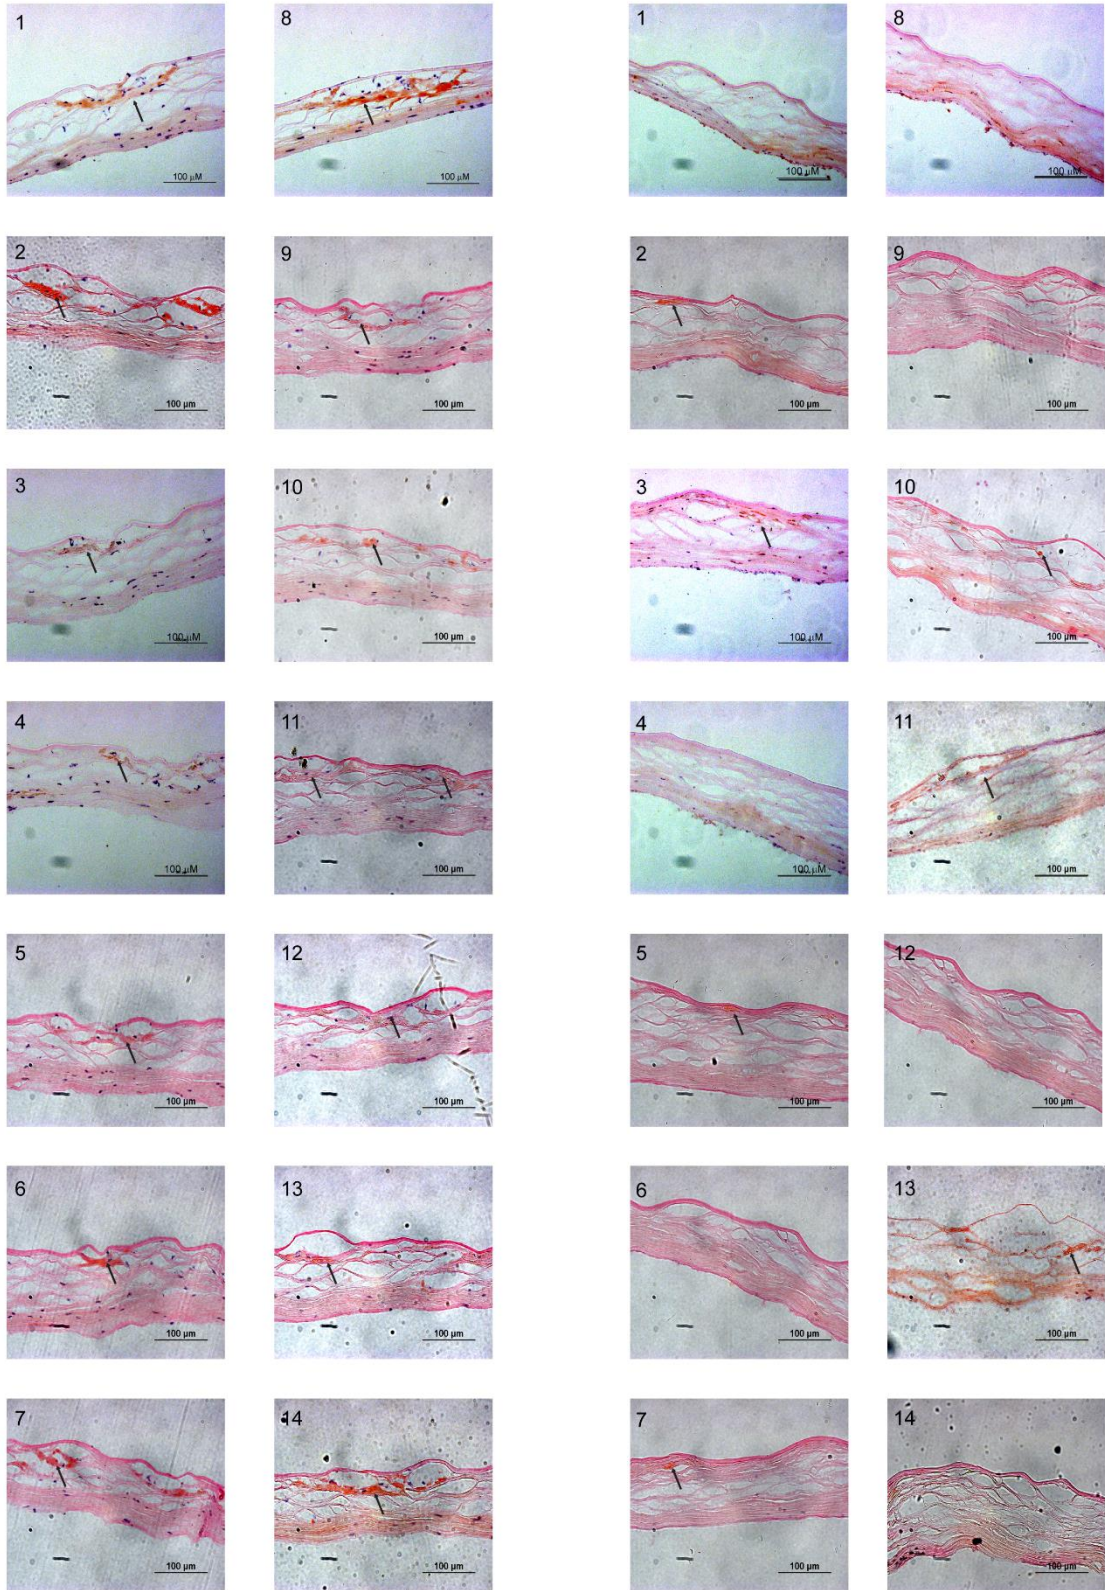

Figure S20: Corneal images collected from a patient with R124C mutation with Congo red staining incubated with control PBS buffer and the same buffer containing 25  $\mu$ M L-PGDS. The amyloid deposits are indicated by the black arrow.

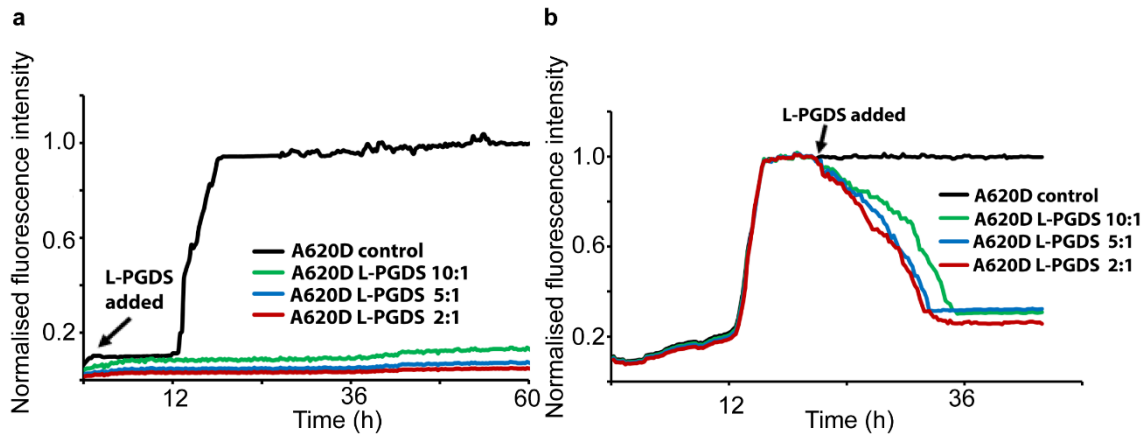

Figure S21: ThT fluorescence assays showing the **a** inhibitory and **b** disaggregation effects of L-PGDS on A620D mutant peptide and preformed fibrils respectively.

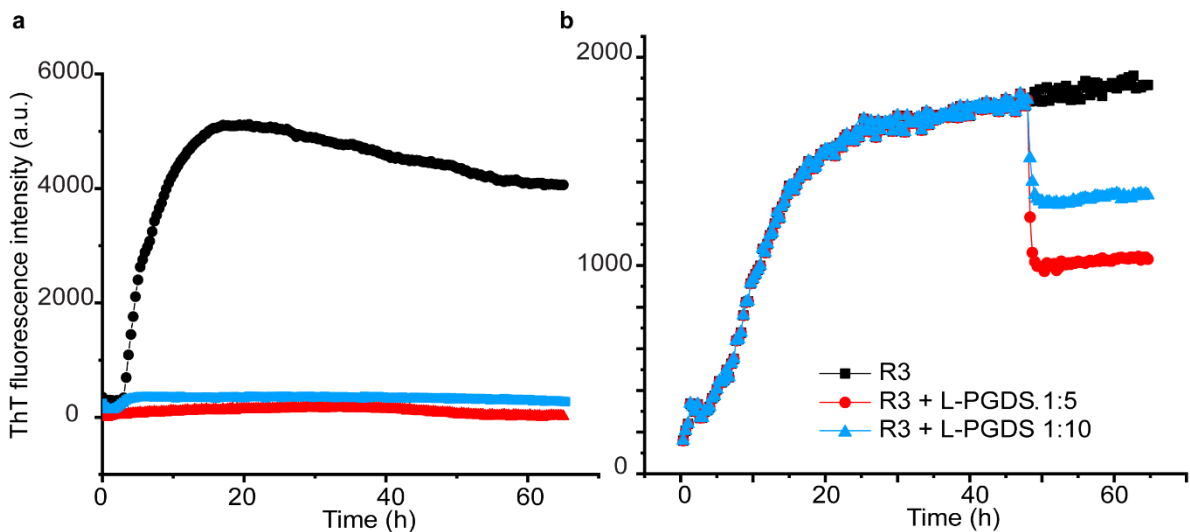

Figure S22: ThT fluorescence assays showing **a** the inhibition and **b** disaggregation effects of L-PGDS on Tau R3 preformed fibrils (Tau R3 peptide sequence: VQIVYKPVVLSKVTSKCGSLGNIHHK)

### Supplementary table:

Table S1:  $^{13}\text{C}$  and  $^{15}\text{N}$  NMR chemical shift values (ppm) for  $^{13}\text{C}$ - and  $^{15}\text{N}$ -labeled sites in G623R fibrils, referenced using the DSS scale with adamantane as a secondary standard for  $^{13}\text{C}$  and calculated indirectly for  $^{15}\text{N}$ . Double peaks observed in extended or turn conformation are labelled as E and T, respectively. (Chemical shift perturbation of respective amino acids after the addition of L-PGDS)

| Residue     | CA                           | N                  | C                    | CB                                       | CD1/CD2                         | CG1                          | CG2  | CZ                          | CE               |
|-------------|------------------------------|--------------------|----------------------|------------------------------------------|---------------------------------|------------------------------|------|-----------------------------|------------------|
| <b>E611</b> | 54.4<br>(E/T:53.5)           |                    | 177.9                | 29.6<br>(E/T:31.5)                       | 180.6                           | 36.2<br>(E/T:35.1)           |      |                             |                  |
| <b>P612</b> | 60.8                         |                    | 175.1                | E:34.3<br>T:33.9                         |                                 | 25.6                         |      |                             |                  |
| <b>V613</b> | 61.2<br>(T:60.2)             | E:127.2<br>T:122.7 | 175.8                | E:36.4<br>T:37.0<br>(T:38.4)             |                                 | 22.8                         | 21.6 |                             |                  |
| <b>A614</b> | 54.2<br>(T:54.8)             | E:128.1<br>T:124.6 | 176.2                | E:22.5<br>T:23.1<br>(T:22.9)             |                                 |                              |      |                             |                  |
| <b>E615</b> | 55.6                         | E:110.0<br>T:107.4 | 178.1<br>(T:177.5)   | E:30.4<br>T:29.6<br>(T:30.3)             | E:180.5<br>T:183.3<br>(T:183.6) | E:36.3<br>T:36.0<br>(T:37.0) |      |                             |                  |
| <b>P616</b> | E:62.1<br>T:63               |                    | 173.8                | E:32.9<br>T:32.3                         |                                 | 27.3                         |      |                             |                  |
| <b>D617</b> | 52.3<br>(E:53.2)<br>(T:50.5) | E:126.6<br>T:130.1 | 174.0                | E:41.0<br>T:41.8<br>(E:40.8)<br>(T:41.3) |                                 | E:176.4<br>T:175.3           |      |                             |                  |
| <b>I618</b> | 60.5<br>(E/T:59.7)           | 121.5              | 173.7                | 36.7<br>(E/T:37.1)                       | 12.7<br>(E/T:15.0)              | 26.9                         | 17.0 |                             |                  |
| <b>M619</b> | 54.9                         | E:129.0<br>T:131.3 | 173.8                | E:33.1<br>T:31.1                         |                                 | 30.4                         |      |                             |                  |
| <b>A620</b> | 55.2                         | 127.7              | 173.8                |                                          |                                 |                              |      |                             |                  |
| <b>T621</b> | 61.7                         | 122.5              | 172.4                | 70.1                                     |                                 |                              | 21.5 |                             |                  |
| <b>N622</b> | 53.2                         | 127.0              | 174.0                | 43.1                                     |                                 | 175.0                        |      |                             |                  |
| <b>R623</b> | 55.6                         | E:130.5<br>T:126.7 | 175.2<br>(T:173.5)   | 30.8<br>(T:29.3)                         | E:42.1<br>T:41.6<br>(T:41.1)    | 27.8                         |      | 159.1<br>159.7<br>(E/T:164) |                  |
| <b>V624</b> | 61.5                         | 125.5              | 175.3                | 35.8                                     |                                 | 22.8                         | 20.5 |                             |                  |
| <b>V625</b> | 61.4                         | 126.8              | 175.4                | 36.0                                     |                                 | 23.0                         | 20.6 |                             |                  |
| <b>H626</b> | 52.8                         | 125.8              | 174.1<br>(E/T:173.5) | 34.4<br>(E/T:35.1)                       | 117.9                           | 137.4<br>(E/T:136.5)         |      |                             | 139.0<br>(136.8) |
| <b>V627</b> | 61.2                         | E:125.2<br>T:130.5 | 175.7                | 33.5                                     |                                 | 21.0                         | 20.0 |                             |                  |
| <b>I628</b> | 59.6                         | 130.6              | 175.2                | 39.4                                     | 13.4                            | 27.0                         | 17.0 |                             |                  |
| <b>T629</b> | 58.5                         | 108.3              | 173.8                | 71.2                                     |                                 |                              | 22.5 |                             |                  |
| <b>N630</b> | 55.5                         | 121.2              | 174.2                | 36.9                                     |                                 | 175.9                        |      |                             |                  |
| <b>V631</b> | 62.0                         | 124.9              | 175.5                | 33.6                                     |                                 | 21.0                         | 20.1 |                             |                  |
| <b>L632</b> | 55.7                         | 128.2              | 177.8                | 42.1                                     | CD1: 26.0<br>CD2: 25.1          | 27.8                         |      |                             |                  |
| <b>Q633</b> | 55.7                         |                    | 175.8                | 31.2                                     | 180.4                           | 34.1                         |      |                             |                  |

Table S2: Chemical shift prediction by online server, Proshift<sup>4</sup>.

| Residue No. | Amino acid | Atom | Extended conformation | Turn conformation |
|-------------|------------|------|-----------------------|-------------------|
| 611         | E          | HA   | 4.35                  | 4.35              |
| 611         | E          | C    | 176.6                 | 176.6             |
| 611         | E          | CA   | 56.4                  | 56.4              |
| 611         | E          | CB   | 29.7                  | 29.7              |
| 612         | P          | HA   | 4.674                 | 4.492             |
| 612         | P          | C    | 176.495               | 176.161           |
| 612         | P          | CA   | 62.854                | 63.155            |
| 612         | P          | CB   | 30.831                | 30.45             |
| 613         | V          | N    | 121.643               | 115.776           |
| 613         | V          | HA   | 4.188                 | 4.386             |
| 613         | V          | C    | 175.561               | 175.298           |
| 613         | V          | CA   | 62.148                | 61.85             |
| 613         | V          | CB   | 32.542                | 32.978            |
| 613         | V          | HN   | 7.903                 | 7.87              |
| 614         | A          | N    | 129.827               | 126.849           |
| 614         | A          | HA   | 4.508                 | 4.416             |
| 614         | A          | C    | 176.399               | 176.736           |
| 614         | A          | CA   | 51.541                | 51.457            |
| 614         | A          | CB   | 19.99                 | 19.832            |
| 614         | A          | HN   | 8.238                 | 8.012             |
| 615         | E          | N    | 122.366               | 120.605           |
| 615         | E          | HA   | 4.589                 | 4.42              |
| 615         | E          | C    | 175.507               | 175.9             |
| 615         | E          | CA   | 55.327                | 55.551            |
| 615         | E          | CB   | 30.515                | 29.816            |
| 615         | E          | HN   | 8.898                 | 8.316             |
| 616         | P          | HA   | 4.581                 | 4.422             |
| 616         | P          | C    | 175.749               | 175.779           |
| 616         | P          | CA   | 62.696                | 63.345            |
| 616         | P          | CB   | 32.358                | 30.56             |
| 617         | D          | N    | 118.497               | 121.935           |
| 617         | D          | HA   | 4.727                 | 4.581             |
| 617         | D          | C    | 175.364               | 175.585           |
| 617         | D          | CA   | 53.691                | 53.609            |
| 617         | D          | CB   | 42.62                 | 44.005            |
| 617         | D          | HN   | 8.318                 | 7.996             |
| 618         | I          | N    | 125.013               | 126.252           |
| 618         | I          | HA   | 4.372                 | 4.068             |
| 618         | I          | C    | 175.676               | 175.386           |
| 618         | I          | CA   | 61.06                 | 62.265            |
| 618         | I          | CB   | 37.752                | 38.025            |
| 618         | I          | HN   | 8.403                 | 8.422             |
| 619         | M          | N    | 127.468               | 130.679           |

|     |   |    |         |         |
|-----|---|----|---------|---------|
| 619 | M | HA | 4.768   | 4.728   |
| 619 | M | C  | 174.842 | 174.883 |
| 619 | M | CA | 54.924  | 55.008  |
| 619 | M | CB | 34.56   | 32.245  |
| 619 | M | HN | 8.444   | 8.65    |
| 620 | A | N  | 125.329 | 126.208 |
| 620 | A | HA | 4.627   | 4.789   |
| 620 | A | C  | 176.774 | 176.905 |
| 620 | A | CA | 51.641  | 52.102  |
| 620 | A | CB | 20.443  | 19.648  |
| 620 | A | HN | 8.372   | 8.445   |
| 621 | T | N  | 118.867 | 119.861 |
| 621 | T | HA | 4.348   | 4.489   |
| 621 | T | C  | 173.822 | 173.258 |
| 621 | T | CA | 62.359  | 62.199  |
| 621 | T | CB | 69.217  | 68.882  |
| 621 | T | HN | 8.342   | 8.528   |
| 622 | N | N  | 123.59  | 121.77  |
| 622 | N | HA | 4.864   | 4.954   |
| 622 | N | C  | 174.38  | 174.457 |
| 622 | N | CA | 52.994  | 52.765  |
| 622 | N | CB | 39.602  | 39.776  |
| 622 | N | HN | 8.604   | 8.419   |
| 623 | R | N  | 125.934 | 121.957 |
| 623 | R | HA | 4.554   | 4.62    |
| 623 | R | C  | 174.839 | 175.353 |
| 623 | R | CA | 55.91   | 55.796  |
| 623 | R | CB | 31.147  | 31.452  |
| 623 | R | HN | 8.557   | 8.368   |
| 624 | V | N  | 123.855 | 122.462 |
| 624 | V | HA | 4.468   | 4.387   |
| 624 | V | C  | 175.149 | 175.834 |
| 624 | V | CA | 61.86   | 62.054  |
| 624 | V | CB | 32.958  | 33.088  |
| 624 | V | HN | 8.43    | 8.353   |
| 625 | V | N  | 125.783 | 126.315 |
| 625 | V | HA | 4.409   | 4.34    |
| 625 | V | C  | 174.359 | 175.068 |
| 625 | V | CA | 61.556  | 62.143  |
| 625 | V | CB | 33.556  | 32.222  |
| 625 | V | HN | 8.314   | 8.388   |
| 626 | H | N  | 126.049 | 125.861 |
| 626 | H | HA | 4.923   | 4.724   |
| 626 | H | C  | 173.197 | 174.767 |
| 626 | H | CA | 55.314  | 55.779  |
| 626 | H | CB | 32.241  | 29.563  |



|     |   |    |         |         |
|-----|---|----|---------|---------|
| 626 | H | HN | 8.217   | 8.414   |
| 627 | V | N  | 122.794 | 129.62  |
| 627 | V | HA | 4.249   | 4.209   |
| 627 | V | C  | 174.599 | 174.846 |
| 627 | V | CA | 61.933  | 61.537  |
| 627 | V | CB | 34.133  | 32.231  |
| 627 | V | HN | 8.318   | 8.643   |
| 628 | I | N  | 127.414 | 127.797 |
| 628 | I | HA | 4.496   | 4.41    |
| 628 | I | C  | 175.325 | 175.905 |
| 628 | I | CA | 60.895  | 60.743  |
| 628 | I | CB | 38.045  | 37.815  |
| 628 | I | HN | 8.473   | 8.276   |
| 629 | T | N  | 119.695 | 120.452 |
| 629 | T | HA | 4.612   | 4.6     |
| 629 | T | C  | 174.586 | 174.257 |
| 629 | T | CA | 61.445  | 61.264  |
| 629 | T | CB | 69.586  | 69.972  |
| 629 | T | HN | 8.392   | 8.495   |
| 630 | N | N  | 124.446 | 122.923 |
| 630 | N | HA | 4.839   | 4.767   |
| 630 | N | C  | 174.313 | 175.475 |
| 630 | N | CA | 52.977  | 52.75   |
| 630 | N | CB | 39.697  | 40.007  |
| 630 | N | HN | 8.812   | 8.633   |
| 631 | V | N  | 122.412 | 121.858 |
| 631 | V | HA | 4.369   | 3.933   |
| 631 | V | C  | 175.336 | 176.439 |
| 631 | V | CA | 61.909  | 62.679  |
| 631 | V | CB | 33.146  | 32.88   |
| 631 | V | HN | 8.394   | 8.294   |
| 632 | L | N  | 129.012 | 128.038 |
| 632 | L | HA | 4.353   | 4.13    |
| 632 | L | C  | 177.69  | 177.72  |
| 632 | L | CA | 55.42   | 56.115  |
| 632 | L | CB | 42.293  | 41.719  |
| 632 | L | HN | 8.516   | 8.332   |
| 633 | Q | N  | 119.801 | 119.801 |
| 633 | Q | HA | 4.341   | 4.341   |
| 633 | Q | CA | 55.804  | 55.804  |
| 633 | Q | CB | 28.739  | 28.739  |
| 633 | Q | HN | 8.228   | 8.271   |

Table S3: Restraints used in G623R fibril structural calculation with CYANA.

| Residues    | <sup>13</sup> C- <sup>13</sup> CDipole coupling<br>(long range contacts) | Torsion angle |        |       |
|-------------|--------------------------------------------------------------------------|---------------|--------|-------|
|             |                                                                          | Low ambiguity | Phi    | Psi   |
| <b>E611</b> |                                                                          | E611C-E611CG  | -85.4  | 112.7 |
| <b>P612</b> | P612CB-M619CB                                                            |               |        |       |
|             | P612CB-D617CB                                                            |               |        |       |
| <b>V613</b> | V613CB-M619CB                                                            |               |        |       |
|             | V613CG2-E615C                                                            |               | -146.7 | 122.5 |
| <b>A614</b> | V613CB-R623CA                                                            |               |        |       |
|             | A614CB-D617CG                                                            |               | -180.0 | 134.4 |
| <b>E615</b> | A614CB-P616CA                                                            |               |        |       |
|             | E615CD-R623CB                                                            | E615CG-A614C  | -85.6  | 112.6 |
| <b>P616</b> |                                                                          |               |        |       |
| <b>D617</b> | D617CB-V614CG2                                                           |               |        |       |
|             | D617CA-I618CG2                                                           |               |        |       |
|             | D617CB-I618C                                                             |               | -109.6 | 30.6  |
|             | D617CB-V615C                                                             |               |        |       |
| <b>I618</b> | D617CA-I618CG2                                                           |               |        |       |
|             | I618CB-V627CG1                                                           |               |        |       |
|             | I618C-M619CB                                                             |               | -118.2 | 102.4 |
|             | I618C-V625C                                                              |               |        |       |
| <b>M619</b> | I618CG1-V625CB                                                           |               |        |       |
| <b>A620</b> |                                                                          |               | -130.7 | 109.2 |
| <b>T621</b> | T621CA-N622C                                                             |               | -145.8 | 111.6 |
|             | T621CB-R623CZ                                                            |               |        | 111.9 |
|             | T621CB-V624C                                                             |               | -135.5 |       |
|             | T621CB-I628CA                                                            |               |        |       |
| <b>N622</b> |                                                                          |               | -145.8 | 113.0 |
| <b>R623</b> | R623CZ-E615CD                                                            |               |        |       |
|             | R623CZ-D617C                                                             |               | -125.4 | 107.7 |
|             | R623CA-V615CB                                                            |               |        |       |

|             |                |                |        |       |
|-------------|----------------|----------------|--------|-------|
|             | R623CA-V615CB  |                |        |       |
|             | R623CD-V625CB  |                |        |       |
| <b>V624</b> | V624CB-R623CA  |                | -136.3 | 110.5 |
| <b>V625</b> |                |                | -139.3 | 108.4 |
|             |                | H626CA-V627CA  |        |       |
| <b>H626</b> | H626CB-N630CA  | H626CG-I628CB  | -142.1 | 111.4 |
|             | H626CB-N630CG  | H626CG-I628CG  |        |       |
|             |                | V627CG1-I628CA |        |       |
| <b>V627</b> |                | V627CA-I628CA  | -140.0 | 103.8 |
| <b>I628</b> |                | I628CD1-V627CA | -134.4 | 107.6 |
|             |                | T629CG2-N630CA |        |       |
| <b>T629</b> | T629CB-Q633C   | T629CG2-N630CB | -159.6 | 131.0 |
|             |                | T629CA-N630CG  |        |       |
| <b>N630</b> | N630CB-Q633CD  |                | -94.4  | 110.5 |
| <b>V631</b> |                |                | -144.7 | 99.4  |
| <b>L632</b> | L632CD1-Q633CB | L632CB-Q633CB  | -95.3  | -50.5 |
| <b>Q633</b> | Q633CD-N622CG  |                |        |       |

Table S4: Frustration levels from residues 611-617 calculated by online server, Frustratometer<sup>2</sup>.

| Residues pair                                                      | Frustration level in TGFBI G623R fibril |                               |                   |            | Frustration level in TGFBI G623R fibril L-PGDS complex |                               |                   |                |
|--------------------------------------------------------------------|-----------------------------------------|-------------------------------|-------------------|------------|--------------------------------------------------------|-------------------------------|-------------------|----------------|
|                                                                    | Frustration state                       | Frustration energy (kcal/mol) | Frustration index | Well state | Frustration state                                      | Frustration energy (kcal/mol) | Frustration index | Well state     |
| 617ASP <sub>N</sub> -617ASP <sub>N+1</sub> (inter)                 | Highly                                  | 1.284                         | -2.947            | Short      | -                                                      | -                             | -                 | -              |
| 617ASP <sub>N</sub> -617ASP <sub>N+1</sub> (inter)                 | Highly                                  | 1.034                         | -2.375            | Short      | -                                                      | -                             | -                 | -              |
| 617ASP <sub>N</sub> -619MET <sub>N</sub> (intra)                   | Highly                                  | 0.657                         | -1.508            | Short      | Neutral                                                | -0.033                        | 0.074             | Water-mediated |
| 617ASP <sub>N</sub> -612PRO <sub>N</sub> (intra)                   | Highly                                  | 0.893                         | -2.051            | Short      | Neutral                                                | -0.147                        | 0.333             | Water-mediated |
| 617ASP <sub>N</sub> -614ALA <sub>N+1</sub> (inter)                 | Highly                                  | 0.821                         | -1.885            | Short      | -                                                      | -                             | -                 | -              |
| 617ASP <sub>N</sub> -614ALA <sub>N</sub> (intra)                   | Highly                                  | 0.516                         | -1.185            | Short      | -                                                      | -                             | -                 | -              |
| 617ASP <sub>N</sub> -615GLU <sub>N</sub> (intra)                   | Highly                                  | 0.63                          | -1.447            | Long       | Neutral                                                | -0.142                        | 0.322             | Water-mediated |
| 617ASP <sub>N</sub> -612PRO <sub>N+1</sub> (inter)                 | -                                       | -                             | -                 | -          | Highly                                                 | 0.615                         | -1.398            | Short          |
| 616PRO <sub>N</sub> -614ALA <sub>N+1</sub> (inter)                 | Highly                                  | 0.919                         | -2.109            | Short      | Highly                                                 | 0.467                         | -1.062            | Short          |
| 616PRO <sub>N</sub> -616PRO <sub>N+1</sub> (inter)                 | Highly                                  | 0.734                         | -1.686            | Short      | -                                                      | -                             | -                 | -              |
| 616PRO <sub>N</sub> -616PRO <sub>N+1</sub> (inter)                 | Highly                                  | 0.54                          | -1.24             | Short      | Minimally                                              | -0.504                        | 1.145             | Water-mediated |
| 615GLU <sub>N</sub> -612PRO <sub>N+1</sub> (inter)                 | -                                       | -                             | -                 | -          | Highly                                                 | 0.685                         | -1.557            | Short          |
| 615GLU <sub>N</sub> -612PRO <sub>N</sub> (intra)                   | -                                       | -                             | -                 | -          | Highly                                                 | 1.064                         | -2.418            | Short          |
| 615GLU <sub>N</sub> -615GLU <sub>N+1</sub> (inter)                 | Highly                                  | 1.215                         | -2.789            | Short      | Neutral                                                | 0.081                         | -0.184            | Water-mediated |
| 615GLU <sub>N</sub> -615GLU <sub>N+1</sub> (inter)                 | Highly                                  | 1.174                         | -2.695            | Short      | Neutral                                                | 0.124                         | -0.281            | Water-mediated |
| 615GLU <sub>N</sub> -614ALA <sub>N+1</sub> (inter)                 | Highly                                  | 0.653                         | -1.498            | Short      | Neutral                                                | -0.018                        | 0.041             | Water-mediated |
| 614ALA <sub>N</sub> -611GLU <sub>N</sub> (intra)                   | -                                       | -                             | -                 | -          | Highly                                                 | 0.764                         | -1.735            | Short          |
| 614ALA <sub>N</sub> -612PRO <sub>N+1</sub> (inter)                 | -                                       | -                             | -                 | -          | Highly                                                 | 0.57                          | -1.296            | Short          |
| 613VAL <sub>N</sub> -611GLU <sub>N</sub> (intra)                   | -                                       | -                             | -                 | -          | Highly                                                 | 1.248                         | -2.835            | Short          |
| 613VAL <sub>N</sub> -612PRO <sub>N+1</sub> (inter)                 | -                                       | -                             | -                 | -          | Highly                                                 | 0.591                         | -1.344            | Long           |
| 612PRO <sub>N</sub> -619MET <sub>N+1</sub> (inter)                 | Highly                                  | 0.514                         | -1.181            | Short      | -                                                      | -                             | -                 | -              |
| 611GLU <sub>N</sub> -613VAL <sub>N+1</sub> (inter)                 | Highly                                  | 0.537                         | -1.233            | Short      | -                                                      | -                             | -                 | -              |
| 611GLU <sub>N</sub> -611GLU <sub>N+1</sub> (inter)                 | Highly                                  | 1.521                         | -3.493            | Short      | -                                                      | -                             | -                 | -              |
| 611GLU <sub>N</sub> -611GLU <sub>N+1</sub> (inter)                 | Highly                                  | 1.459                         | -3.349            | Short      | -                                                      | -                             | -                 | -              |
| 611GLU <sub>N</sub> -OPP 611GLU <sub>N</sub> (inter)               | Highly                                  | 1.476                         | -3.39             | Short      | -                                                      | -                             | -                 | -              |
| 611GLU <sub>N</sub> -OPP 611GLU <sub>N+1</sub> (inter)             | Highly                                  | 1.456                         | -3.334            | Short      | -                                                      | -                             | -                 | -              |
| Frustration free energy (kcal/mol/monomer)                         | 5.34                                    |                               |                   |            | 1.585                                                  |                               |                   |                |
| Frustration free energy released (kcal/mol/monomer)                | -3.76                                   |                               |                   |            |                                                        |                               |                   |                |
| Number of highly frustrated residue pairs from residues 611 to 617 | 19                                      |                               |                   |            | 8                                                      |                               |                   |                |
| Total number of frustrated residue pairs                           | 420                                     |                               |                   |            | 221                                                    |                               |                   |                |

Mean decoy energy for G623R fibril = -1.753 kcal/mol/monomer and Mean decoy energy for G623R/L-PGDS complex = -1.739 kcal/mol/monomer

\*The units kcal/mol/chain and kcal/mol/monomer are equivalent and used interchangeably.

Electrostatic interactions are highlighted in green.

Table S5: List of proteins that are enriched in amyloid deposits in corneal tissues<sup>5</sup> and

| Protein                                               | Quantity of protein released by PBS buffer | Quantity of protein released by L-PGDS | Fold Increase |
|-------------------------------------------------------|--------------------------------------------|----------------------------------------|---------------|
| Histone H2B type 1                                    | 371686.9375                                | 7001935.5                              | 18.8          |
| E3 ubiquitin                                          | 96305.42188                                | 690102.625                             | 7.17          |
| Tubulin beta-4B chain                                 | 624293.5                                   | 3168117.5                              | 5.07          |
| Complement component C8 gamma chain                   | 139084.3438                                | 570552                                 | 4.10          |
| Vitronectin                                           | 29101.73828                                | 72839.58594                            | 2.50          |
| Sushi repeat-containing protein SRPX2                 | 40251.14844                                | 81905.25781                            | 2.03          |
| C-type lectin domain family 11 member A               | 1072164.75                                 | 1911336.125                            | 1.78          |
| Heat shock protein beta-1                             | 4898013.5                                  | 8259086.5                              | 1.68          |
| Serum amyloid P-component                             | 410277.8125                                | 638196.5                               | 1.56          |
| Alpha-enolase                                         | 13605672                                   | 20922466                               | 1.54          |
| Clusterin                                             | 3787982                                    | 5671733.5                              | 1.50          |
| Angiopoietin-related protein 7                        | 3105031.5                                  | 4394892                                | 1.42          |
| Fibulin-1                                             | 330578.4688                                | 451854.2188                            | 1.37          |
| Peroxiredoxin-1                                       | 9459418                                    | 12074252                               | 1.28          |
| Transforming growth factor-beta-induced protein ig-h3 | 97707320                                   | 120308304                              | 1.23          |
| Fibulin-5                                             | 82386.02344                                | 94833.89844                            | 1.15          |
| Apolipoprotein A-IV                                   | 309395.8125                                | 350152.2813                            | 1.13          |
| Serine protease HTRA1                                 | 95254.125                                  | 105348.8203                            | 1.11          |

released by PBS/L-PGDS treatment.

Table S6: Acquisition and processing parameters of ssNMR experiments used for resonance assignment of G623R fibrils and L-PGDS/G623R fibril complex

| Experiment                | NCACX                       | NCOCX        | CANCO        | NCA          | NCO          | CC    | CC    |
|---------------------------|-----------------------------|--------------|--------------|--------------|--------------|-------|-------|
| Field (T)                 | 18.8                        |              |              |              |              |       |       |
| MAS rate (kHz)            | 17.857                      |              |              |              |              |       |       |
| Probe                     | Bruker 1.9 mm HCN MAS probe |              |              |              |              |       |       |
| Transfer 1                | HN CP                       | HN CP        | HC CP        | HC CP        | HC CP        | HC CP | HC CP |
| Transfer time             | 1.2                         | 1.2          | 1.4          | 1.2          | 1.2          | 1.4   | 1.4   |
| Carrier (ppm)<br>13C, 15N | 100                         | 100          | 100          | 52           | 175          | 100   | 100   |
| Transfer 2                | NCA specific                | NCO specific | CAN specific | NCA specific | NCO specific | DARR  | DARR  |
| Transfer time             | 3                           | 3.5          | 3            | 3            | 3            | 20    | 75    |
| Carrier (ppm)<br>13C, 15N | 100                         | 100          | 119          | 115          | 115          | 100   | 100   |
| Transfer 3                | DARR                        | DARR         | NCO specific | -            | -            | -     | -     |
| Transfer time             | 75                          | 75           | 4.5          | -            | -            | -     | -     |
| Carrier (ppm)<br>13C, 15N | 119                         | 119          | 100          | -            | -            | -     | -     |
| Digitalisation, F1        | N                           | N            | CA           | N            | N            | C     | C     |
| T1 increments             | 36                          | 36           | 72           | 224          | 224          | 896   | 896   |

|                       |          |          |          |          |           |           |           |
|-----------------------|----------|----------|----------|----------|-----------|-----------|-----------|
| Sweep width (kHz)     | 2551     | 2551     | 5952.333 | 8928.5   | 8928.5    | 53571     | 53571     |
| Acquisition time (ms) | 7.05     | 7.05     | 6.04     | 12.5     | 12.5      | 8.3       | 8.3       |
| Digitalisation, F2    | CA       | CO       | N        | C        | C         | C         | C         |
| T2 increments         | 78       | 30       | 36       | 1536     | 512       | 1664      | 1664      |
| Sweep width (kHz)     | 5952.333 | 2231.75  | 2551     | 53571.43 | 17857.143 | 53571.43  | 53571.43  |
| Acquisition time (ms) | 6.55     | 6.72     | 7.05     | 14.3     | 14.3      | 15.5      | 15.5      |
| Digitalisation, F3    | C        | C        | C        | -        | -         | -         | -         |
| T3 increments         | 1536     | 1536     | 1536     | -        | -         | -         | -         |
| Sweep width (kHz)     | 53571.43 | 53571.43 | 53571.43 | -        | -         | -         | -         |
| Acquisition time (ms) | 14.3     | 14.3     | 14.3     | -        | -         | -         | -         |
| Total scans           | 48       | 96       | 32       | 64       | 64        | 16        | 16        |
| Recycle delay         | 1.5      | 1.5      | 1.5      | 1.5      | 1.5       | 1.5       | 1.5       |
| Total experiment time | 63h      | 48h      | 40h      | 6h       | 6h        | 6h 20 min | 6h 33 min |
| Window function (WDW) | QSINE    | QSINE    | QSINE    | QSINE    | QSINE     | QSINE     | QSINE     |
| Sine bell shift (SSB) | 0.1      | 0.1      | 0.1      | 0.1      | 0.1       | 0.1       | 0.1       |

## Supplementary References

- 1 Usov, I. & Mezzenga, R. FiberApp: An Open-Source Software for Tracking and Analyzing Polymers, Filaments, Biomacromolecules, and Fibrous Objects. *Macromolecules* **48**, 1269-1280, doi:10.1021/ma502264c (2015).
- 2 Parra, R. G. *et al.* Protein Frustratometer 2: a tool to localize energetic frustration in protein molecules, now with electrostatics. *Nucleic acids research* **44**, W356-360, doi:10.1093/nar/gkw304 (2016).
- 3 Anandalakshmi, V. *et al.* Effect of position-specific single-point mutations and biophysical characterization of amyloidogenic peptide fragments identified from lattice corneal dystrophy patients. *The Biochemical journal* **474**, 1705-1725, doi:10.1042/BCJ20170125 (2017).
- 4 Meiler, J. PROSHIFT: protein chemical shift prediction using artificial neural networks. *J Biomol NMR* **26**, 25-37, doi:10.1023/a:1023060720156 (2003).
- 5 Venkatraman, A. *et al.* Proteomic Analysis of Amyloid Corneal Aggregates from TGFBI-H626R Lattice Corneal Dystrophy Patient Implicates Serine-Protease HTRA1 in Mutation-Specific Pathogenesis of TGFBIp. *J Proteome Res* **16**, 2899-2913, doi:10.1021/acs.jproteome.7b00188 (2017).
