# Supplementary material for: Release of frustration drives corneal amyloid disaggregation by brain chaperone
Source: PubMed Central journal article supplement (PMC10063603; doi:10.1038/s42003-023-04725-1), 2023-03-30
Supplement: 42003_2023_4725_MOESM2_ESM.pdf [file 42003_2023_4725_MOESM2_ESM.pdf]

## Description of Additional Supplementary Files

**File name:** Supplementary Data 1

**Description:** The source data behind the graphs in the paper.

**File name:** Supplementary Data 2

**Description:** Initial coordinate of MD simulation

**File name:** Supplementary Data 3

**Description:** MD Coordinate file for Figure S14

**File name:** Supplementary Data 4

**Description:** MD simulation input file

**File name:** Supplementary Video

**Description:** MD simulation video of the TGFBIp G623R fibril and L-PGDS complex.
